# Supplementary material
Source: PubMed Central journal article supplement (PMC3374316)
Supplement: supp_112.139295_139295SI.pdf [file supp_112.139295_139295SI.pdf]

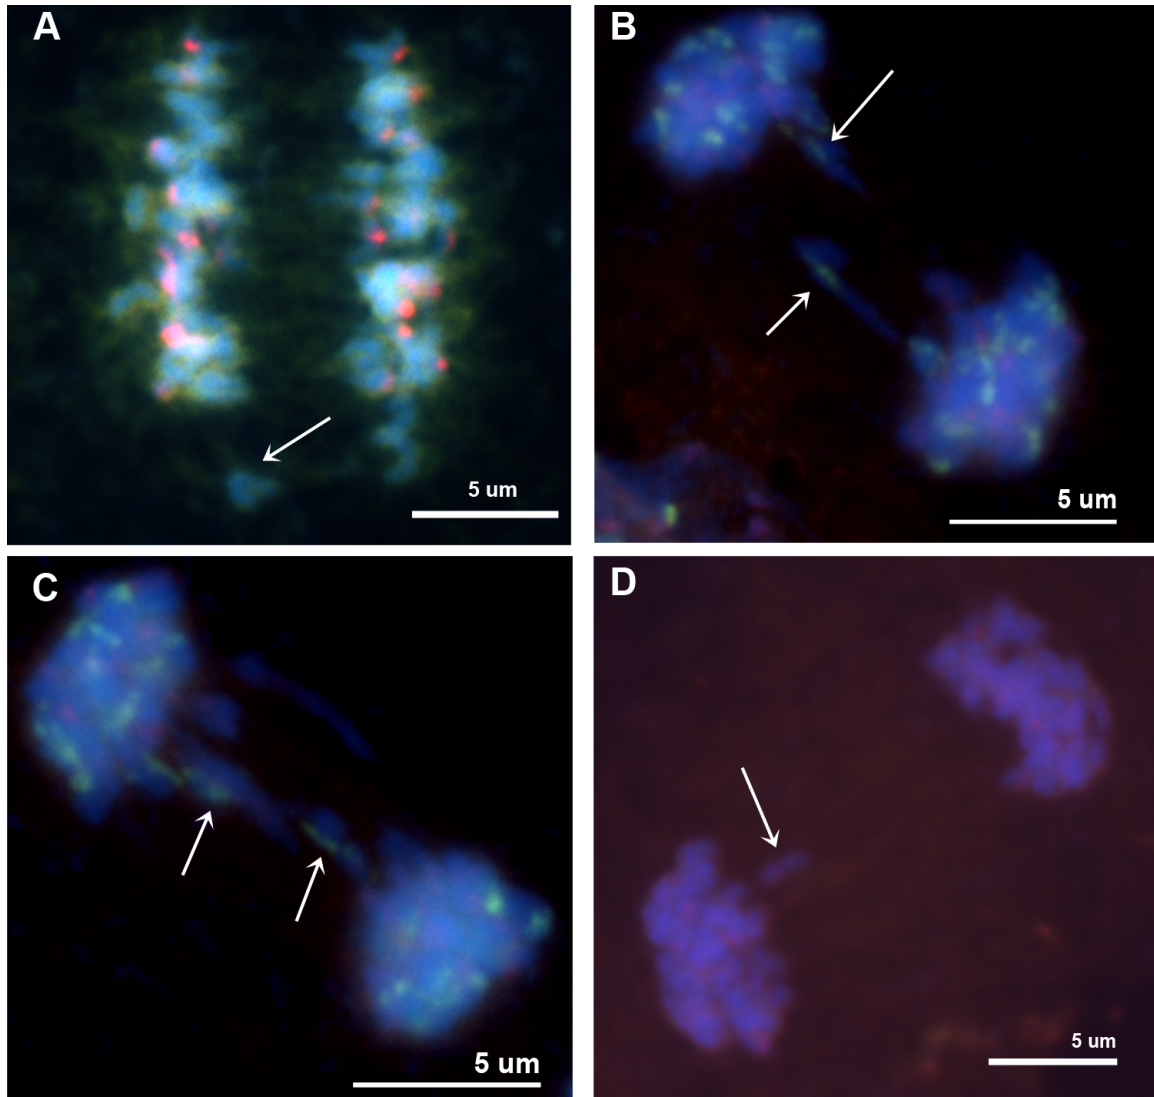

**Figure S1** Laggards and bridges in meiotic (A) and mitotic (B-D) cells of allohexaploids. Cells were prepared for FISH as described in the methods and centromeres labeled with fluorescein (green, *At*) or Texas Red (red, *Aa*). Arrows point to bridges or laggards between dividing cells. A: F9 12-3-5-2, B: F8 2-8-5-3, C: F8 2-8-5-3, D: F8 2-8-5-3.

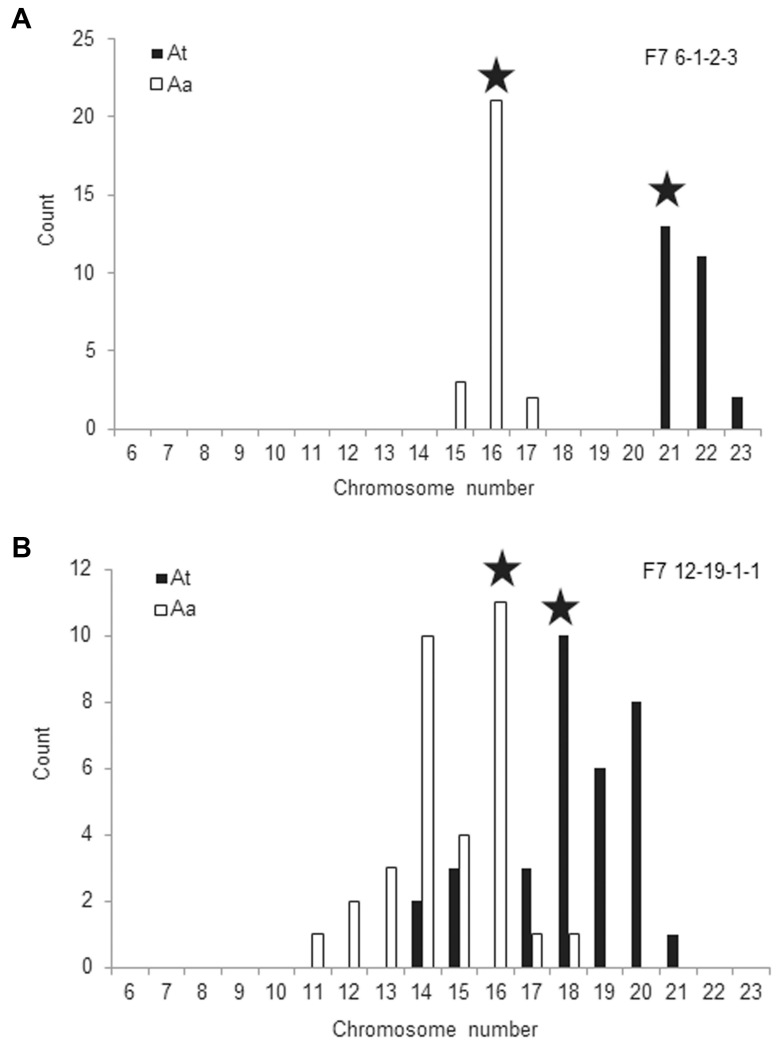

**Figure S2** Somatic mosaicism in F7 *Arabidopsis* allohexaploids. Two examples illustrating the adjusted euploid number in two individuals (12-19-1-1 and 6-1-2-3) from separate sibling lines. N= 33 analyzed cells (A), N= 26 analyzed cells (B). The modal chromosome numbers (“adjusted euploid” values) are denoted by stars for each parental genome. Original euploid chromosome numbers (additive from the progenitors) were 20/16.

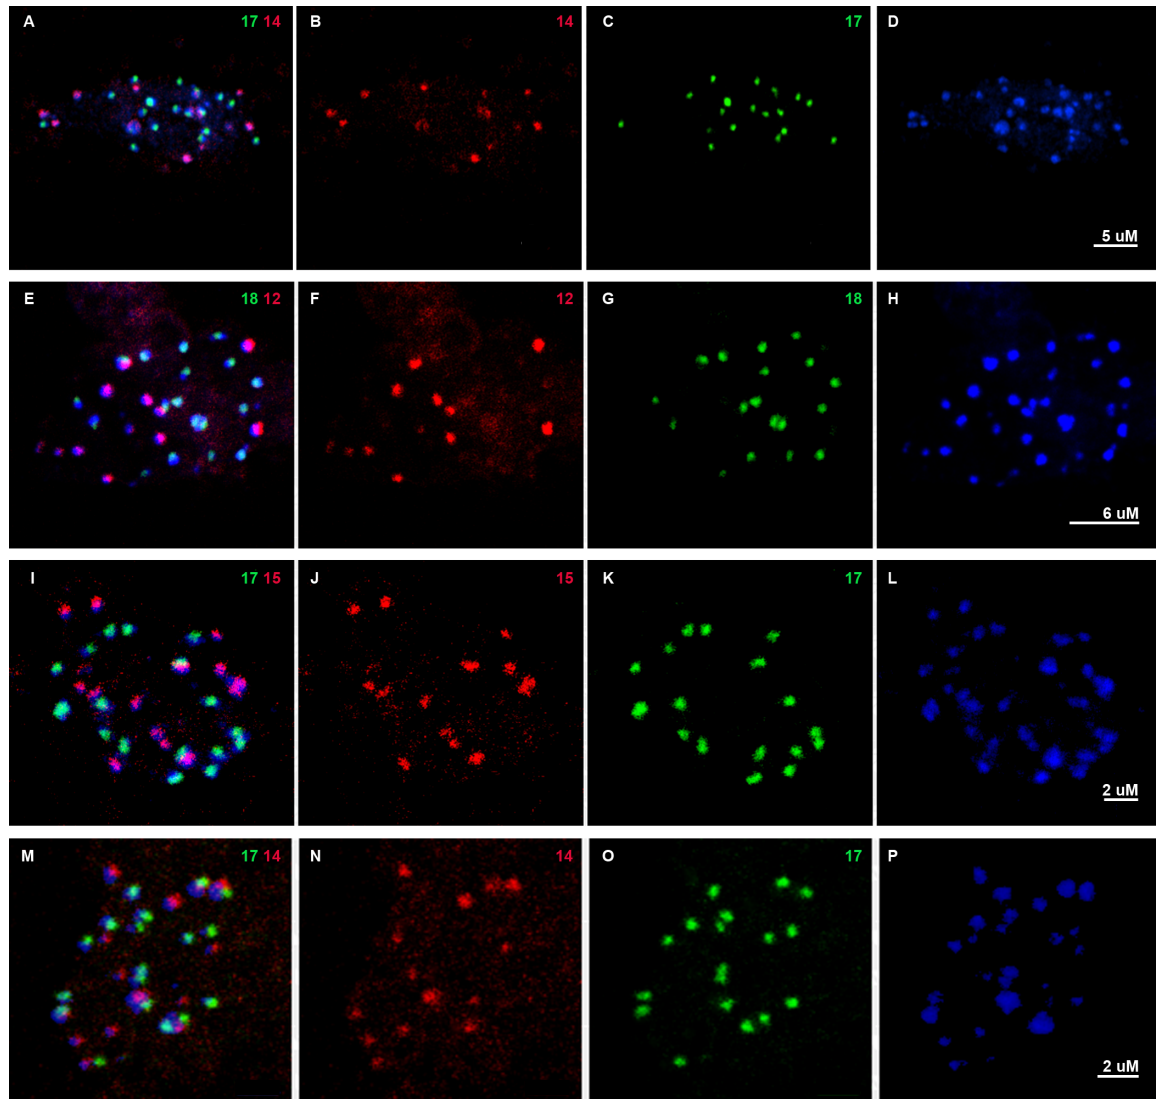

**Figure S3** Mitotic chromosomes in root tip cells of allohexaploids. FISH was performed as described in Fig. 3. Composites as well as separate Texas Red, Fluorescein, and DAPI channels are shown for 4 examples A-D: F6 6-1-8, E-H: F7 6-1-9. I-L: F7 19-1-9-1. M-P F7 19-1-9-1.. Numbers in top right corner of each panel indicate the chromosome number of that particular cell (green: *At* chromosomes; red: *Aa* chromosomes). In panel O the *At* chromosome number maybe 17 or 18, but either case indicates hyperploidy.

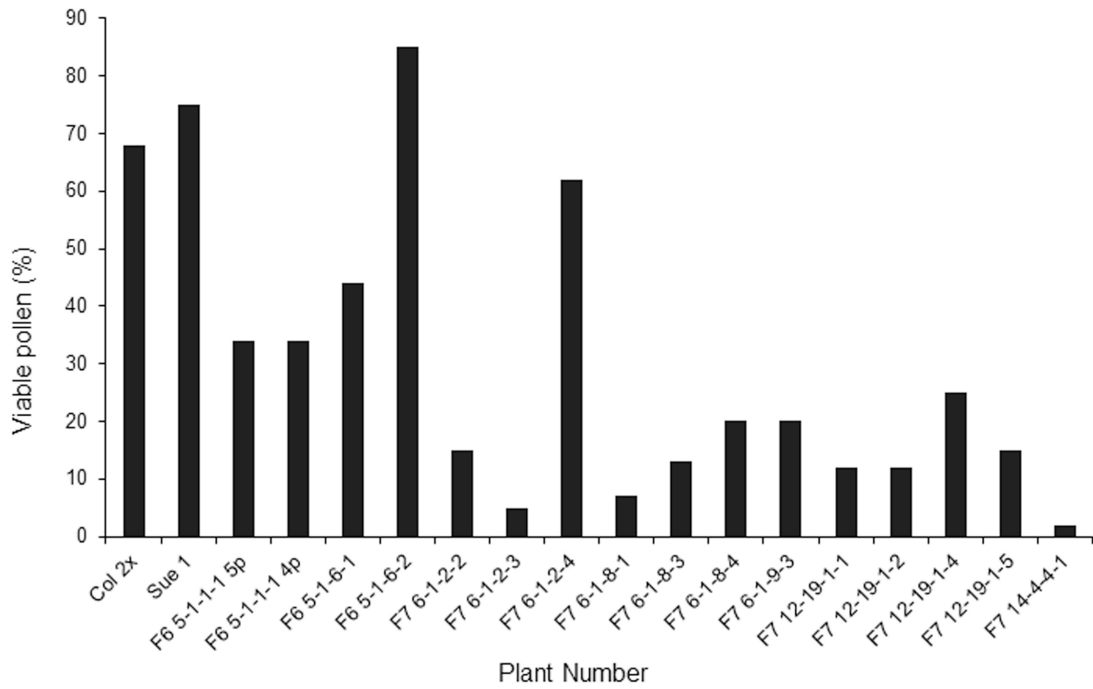

**Figure S4** Pollen viability in allohexaploids and progenitors. Live/dead staining of pollen was performed using acetocarmine. The average percent viability for the parent species was  $71 \pm 2.5\%$ , (SE, N=2) while the overall average for allohexaploids was  $25 \pm 5.6\%$  (SE, N=16), which was statistically significantly different ( $p=0.012$ ,  $t=2.84$ ,  $df=16$ ).

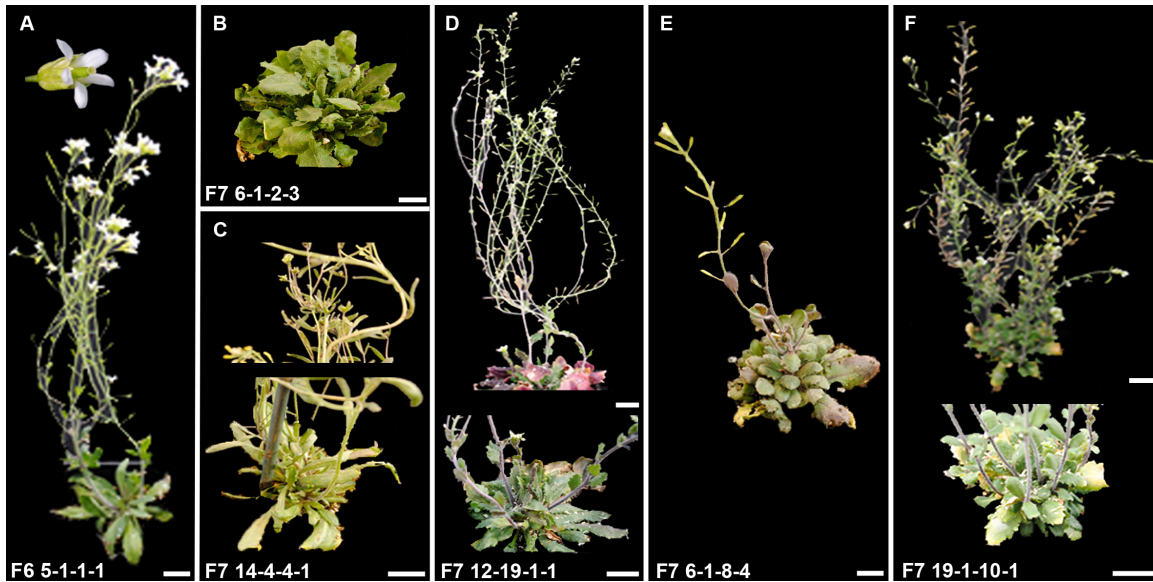

**Figure S5** Phenotypic variation in F6 and F7 allohexaploids. A) F6 5-1-1-1 individual with 5 petals. B) Rosette of F7 6-1-2-3. C) F7 14-4-4-1. D) F7 12-19-1-1 with close-up of rosette. E) F7 6-1-8-4. F) 19-1-10-1 with close-up of rosette. Size bar = 2cm.

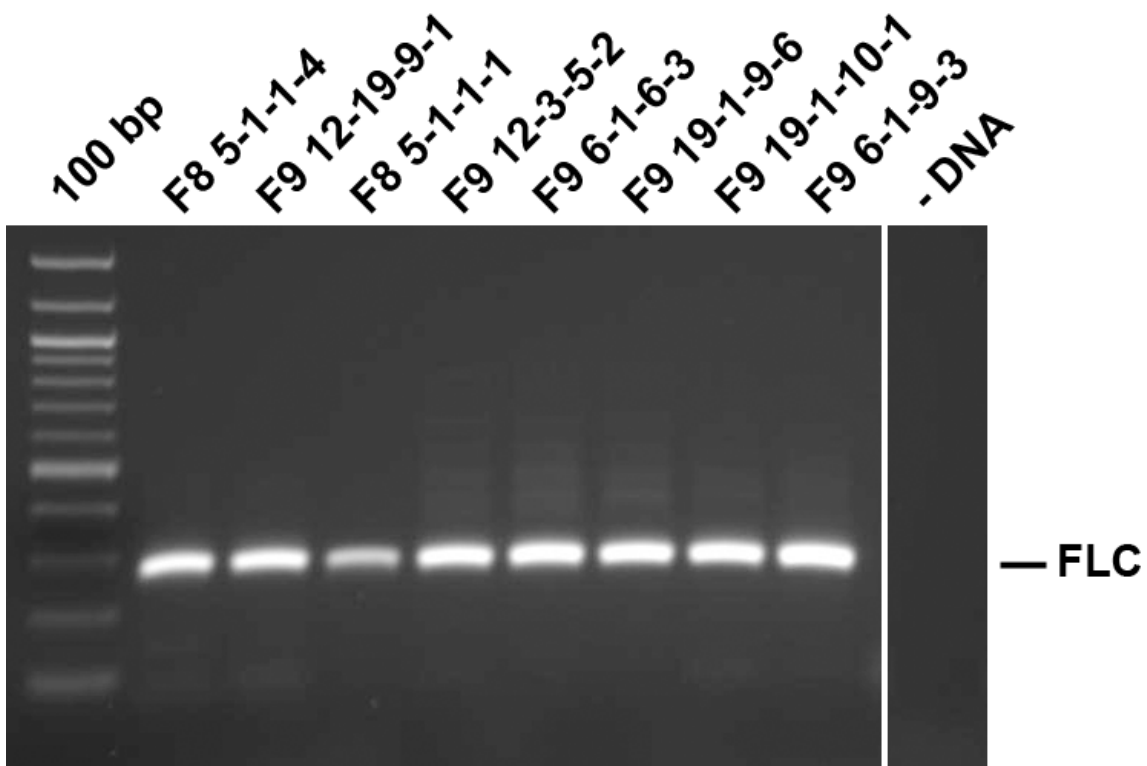

**Figure S6** Steady state expression of *FLC* in early and late flowering allohexaploids. RNA was isolated from two late flowering (5-1-1-4; 12-19-9-1) and six early flowering allohexaploid individuals, DNase-treated, and reverse transcribed. Intron-spanning primers for *FLC* were used in RT-PCR (809 bp for genomic DNA, 266 bp for cDNA). Loading control experiments to ascertain that similar amounts of cDNA were loaded were performed with actin and tubulin (data not shown). PCR products were digested with *Clal* which uses a polymorphic site that distinguishes between *FLC* alleles derived either from *A. thaliana* or from *A. arenosa/suecica*. *Clal* digest showed that both types of alleles were expressed (data not shown). The data suggest that *FLC* expression in these non-vernalized plants is not the primary cause for the difference in flowering time.

**Table S1 Frequency of Aneuploidy in Allohexaploids over 3 Generations Based on Expected Chromosome Numbers\*.**

| Generation | Plant Number   | Cells analyzed | Aneuploid cells (%) | Cells with                        | Cells with                        | At                           | Aa                           | At                        | Aa                        |
|------------|----------------|----------------|---------------------|-----------------------------------|-----------------------------------|------------------------------|------------------------------|---------------------------|---------------------------|
|            |                |                |                     | expected At chromosome number (%) | expected Aa chromosome number (%) | hyperploid** chromosomes (%) | hyperploid** chromosomes (%) | hypoploid chromosomes (%) | hypoploid chromosomes (%) |
| F3         | 2-1            | 10             | 100                 | 0                                 | 30                                | 20                           | 20                           | 80                        | 50                        |
|            | 2-5            | 10             | 90                  | 20                                | 40                                | 0                            | 10                           | 80                        | 50                        |
|            | 2-8            | 11             | 100                 | 0                                 | 27                                | 0                            | 27                           | 100                       | 45                        |
|            | 5-1            | 10             | 90                  | 10                                | 30                                | 0                            | 0                            | 90                        | 70                        |
|            | 5-2            | 10             | 90                  | 10                                | 40                                | 10                           | 0                            | 80                        | 60                        |
|            | 5-3            | 14             | 100                 | 0                                 | 93                                | 0                            | 0                            | 100                       | 7                         |
|            | 6-1            | 11             | 91                  | 18                                | 45                                | 9                            | 18                           | 73                        | 36                        |
|            | 6-5            | 11             | 100                 | 0                                 | 64                                | 0                            | 9                            | 100                       | 27                        |
|            | 6-10           | 11             | 91                  | 27                                | 9                                 | 0                            | 27                           | 73                        | 64                        |
|            | 12-3           | 12             | 92                  | 25                                | 30                                | 0                            | 17                           | 75                        | 50                        |
|            | 12-11          | 10             | 90                  | 20                                | 50                                | 0                            | 10                           | 80                        | 40                        |
|            | 12-19          | 11             | 91                  | 9                                 | 55                                | 0                            | 0                            | 91                        | 45                        |
|            | 14-2           | 10             | 100                 | 0                                 | 10                                | 0                            | 10                           | 100                       | 80                        |
|            | 14-4           | 10             | 100                 | 30                                | 40                                | 10                           | 30                           | 60                        | 30                        |
|            | 14-9           | 21             | 95                  | 10                                | 24                                | 5                            | 0                            | 86                        | 76                        |
|            | 19-1           | 10             | 100                 | 0                                 | 30                                | 0                            | 0                            | 100                       | 70                        |
|            | 19-3           | 11             | 100                 | 0                                 | 18                                | 0                            | 0                            | 100                       | 82                        |
|            | 19-5           | 11             | 100                 | 18                                | 18                                | 18                           | 9                            | 64                        | 73                        |
|            | <b>Average</b> |                |                     | <b>96</b>                         | <b>11</b>                         | <b>36</b>                    | <b>4</b>                     | <b>10</b>                 | <b>85</b>                 |

| Generation | Plant Number   | Cells analyzed | Aneuploid cells (%) | Cells with expected At chromosome number (%) | Cells with expected Aa chromosome number (%) | At hyperploid** chromosomes (%) | Aa hyperploid** chromosomes (%) | At hypoploid chromosomes (%) | Aa hypoploid chromosomes (%) |           |
|------------|----------------|----------------|---------------------|----------------------------------------------|----------------------------------------------|---------------------------------|---------------------------------|------------------------------|------------------------------|-----------|
| F6         | 2-8-3          | 1              | 100                 | 0                                            | 100                                          | 0                               | 0                               | 100                          | 100                          |           |
|            | 2-8-5          | 9              | 44                  | 78                                           | 78                                           | 0                               | 0                               | 33                           | 22                           |           |
|            | 5-1-1-1<br>5   | 25             | 96                  | 25                                           | 72                                           | 0                               | 0                               | 96                           | 68                           |           |
|            | 5-1-1-1<br>4   | 25             | 100                 | 25                                           | 88                                           | 0                               | 0                               | 96                           | 12                           |           |
|            | 5-1-6-1        | 26             | 100                 | 26                                           | 35                                           | 0                               | 0                               | 65                           | 58                           |           |
|            | 5-1-6-2        | 6              | 100                 | 6                                            | 33                                           | 0                               | 0                               | 100                          | 50                           |           |
|            | 5-1-6-4        | 13             | 100                 | 13                                           | 77                                           | 0                               | 8                               | 100                          | 15                           |           |
|            | 6-1-2          | 8              | 50                  | 63                                           | 75                                           | 13                              | 13                              | 25                           | 13                           |           |
|            | 6-1-6          | 7              | 71                  | 29                                           | 71                                           | 0                               | 0                               | 71                           | 43                           |           |
|            | 6-1-8          | 7              | 100                 | 0                                            | 86                                           | 100                             | 0                               | 0                            | 14                           |           |
|            | 6-1-9          | 4              | 50                  | 50                                           | 100                                          | 50                              | 0                               | 0                            | 0                            |           |
|            | 12-19-1        | 10             | 100                 | 0                                            | 100                                          | 0                               | 0                               | 20                           | 0                            |           |
|            | 12-19-9        | 1              | 0                   | 100                                          | 100                                          | 0                               | 0                               | 0                            | 0                            |           |
|            | 14-4-3         | 2              | 100                 | 0                                            | 100                                          | 0                               | 0                               | 100                          | 0                            |           |
|            | 14-4-4         | 7              | 100                 | 0                                            | 0                                            | 0                               | 0                               | 100                          | 100                          |           |
|            | 19-1-4         | 7              | 14                  | 86                                           | 100                                          | 0                               | 0                               | 14                           | 0                            |           |
|            | 19-1-9         | 6              | 100                 | 0                                            | 100                                          | 0                               | 0                               | 100                          | 0                            |           |
|            | 19-1-10        | 7              | 86                  | 14                                           | 100                                          | 71                              | 0                               | 14                           | 0                            |           |
|            | <b>Average</b> |                |                     | <b>78</b>                                    | <b>29</b>                                    | <b>79</b>                       | <b>13</b>                       | <b>1</b>                     | <b>58</b>                    | <b>27</b> |



| Generation | Plant Number | Cells analyzed | Aneuploid cells (%) | Cells with expected At chromosome number (%) | Cells with expected Aa chromosome number (%) | At hyperploid** chromosomes (%) | Aa hyperploid** chromosomes (%) | At hypoploid chromosomes (%) | Aa hypoploid chromosomes (%) |
|------------|--------------|----------------|---------------------|----------------------------------------------|----------------------------------------------|---------------------------------|---------------------------------|------------------------------|------------------------------|
| F7         | 6-1-2-1      | 7              | 100                 | 7                                            | 14                                           | 0                               | 86                              | 100                          | 0                            |
|            | 6-1-2-2      | 24             | 100                 | 13                                           | 4                                            | 88                              | 0                               | 0                            | 96                           |
|            | 6-1-2-3      | 26             | 100                 | 0                                            | 81                                           | 100                             | 8                               | 0                            | 12                           |
|            | 6-1-2-4      | 6              | 50                  | 50                                           | 83                                           | 0                               | 0                               | 50                           | 17                           |
|            | 6-1-6-2      | 11             | 18                  | 82                                           | 100                                          | 0                               | 0                               | 18                           | 0                            |
|            | 6-1-6-4      | 4              | 100                 | 0                                            | 75                                           | 75                              | 0                               | 25                           | 25                           |
|            | 6-1-8-1      | 38             | 89                  | 38                                           | 50                                           | 3                               | 0                               | 74                           | 50                           |
|            | 6-1-8-2      | 9              | 100                 | 11                                           | 11                                           | 11                              | 11                              | 78                           | 78                           |
|            | 6-1-8-3      | 13             | 92                  | 15                                           | 46                                           | 62                              | 0                               | 23                           | 54                           |
|            | 6-1-8-4      | 28             | 93                  | 7                                            | 68                                           | 71                              | 0                               | 18                           | 32                           |
|            | 6-1-9-1      | 28             | 96                  | 7                                            | 18                                           | 0                               | 0                               | 93                           | 89                           |
|            | 6-1-9-3      | 13             | 92                  | 31                                           | 38                                           | 15                              | 8                               | 54                           | 54                           |
|            | 6-1-9-4      | 11             | 100                 | 0                                            | 55                                           | 0                               | 0                               | 100                          | 73                           |
|            | 12-1-9-4     | 38             | 95                  | 8                                            | 16                                           | 0                               | 0                               | 92                           | 84                           |
|            | 12-3-5-1     | 9              | 89                  | 9                                            | 45                                           | 0                               | 0                               | 89                           | 44                           |
|            | 12-19-1-1    | 33             | 82                  | 24                                           | 33                                           | 3                               | 6                               | 73                           | 61                           |

| Generation | Plant Number   | Cells analyzed | Aneuploid cells (%) | Cells with expected At chromosome number (%) | Cells with expected Aa chromosome number (%) | Cells with At hyperploid** chromosomes (%) | Cells with Aa hyperploid** chromosomes (%) | Cells with At hypoploid chromosomes (%) | Cells with Aa hypoploid chromosomes (%) |
|------------|----------------|----------------|---------------------|----------------------------------------------|----------------------------------------------|--------------------------------------------|--------------------------------------------|-----------------------------------------|-----------------------------------------|
| F7         | 12-19-1-2      | 27             | 89                  | 26                                           | 63                                           | 0                                          | 4                                          | 74                                      | 33                                      |
|            | 12-19-1-4      | 15             | 93                  | 7                                            | 87                                           | 0                                          | 0                                          | 93                                      | 87                                      |
|            | 12-19-1-5      | 11             | 100                 | 0                                            | 9                                            | 0                                          | 0                                          | 100                                     | 91                                      |
|            | 12-19-9-1      | 7              | 29                  | 86                                           | 86                                           | 14                                         | 0                                          | 0                                       | 14                                      |
|            | 14-3-3-1       | 17             | 100                 | 17                                           | 12                                           | 0                                          | 6                                          | 94                                      | 82                                      |
|            | 14-4-4-1       | 25             | 100                 | 25                                           | 4                                            | 0                                          | 0                                          | 100                                     | 96                                      |
|            | 19-1-9-1       | 35             | 100                 | 35                                           | 11                                           | 0                                          | 6                                          | 100                                     | 83                                      |
|            | 19-1-9-2       | 9              | 100                 | 9                                            | 22                                           | 0                                          | 0                                          | 100                                     | 78                                      |
|            | 19-1-9-3       | 26             | 100                 | 27                                           | 22                                           | 0                                          | 4                                          | 96                                      | 70                                      |
|            | 19-1-9-4       | 28             | 82                  | 18                                           | 43                                           | 0                                          | 0                                          | 79                                      | 57                                      |
|            | 19-1-9-5       | 20             | 100                 | 20                                           | 30                                           | 0                                          | 0                                          | 100                                     | 70                                      |
|            | 19-1-9-6       | 20             | 100                 | 20                                           | 10                                           | 0                                          | 5                                          | 100                                     | 85                                      |
|            | 19-1-9-7       | 17             | 100                 | 17                                           | 6                                            | 0                                          | 6                                          | 76                                      | 88                                      |
|            | 19-1-9-9       | 15             | 100                 | 15                                           | 33                                           | 0                                          | 0                                          | 93                                      | 67                                      |
|            | 19-1-10-1      | 40             | 70                  | 40                                           | 60                                           | 40                                         | 5                                          | 15                                      | 35                                      |
|            | 19-1-10-2      | 16             | 62                  | 16                                           | 50                                           | 0                                          | 0                                          | 63                                      | 50                                      |
|            | <b>Average</b> |                |                     | <b>89</b>                                    | <b>24</b>                                    | <b>34</b>                                  | <b>3</b>                                   | <b>2</b>                                | <b>80</b>                               |

\* Expected chromosome number is: At - 20; Aa - 16

\*\* Hyperploid chromosomes are those that exceed the expected number and hypoploid chromosomes are those that are fewer than the expected number

Table S2 Frequency of Aneuploidy in Allohexaploids over 3 Generations Based on Modal Chromosome Numbers.

| Generation | Plant number  | Cells analyzed | Modal chromosome |    | Aneuploid (%) |
|------------|---------------|----------------|------------------|----|---------------|
|            |               |                | numbers*         |    |               |
|            |               |                | At               | Aa |               |
| F3         | 2-1           | 10             | 18               | 16 | 90            |
|            | 2-5           | 10             | 18               | 16 | 90            |
|            | 2-8           | 11             | 19               | 16 | 91            |
|            | 5-1           | 10             | 17               | 16 | 100           |
|            | 5-2           | 10             | 17               | 14 | 80            |
|            | 5-3           | 14             | 19               | 16 | 64            |
|            | 6-1           | 11             | 19               | 16 | 73            |
|            | 6-5           | 11             | 16               | 16 | 73            |
|            | 6-10          | 11             | 16               | 13 | 91            |
|            | 12-3          | 12             | 17               | 16 | 75            |
|            | 12-11         | 10             | 19               | 16 | 70            |
|            | 12-19         | 11             | 19               | 16 | 64            |
|            | 14-2          | 10             | 16               | 15 | 80            |
|            | 14-4          | 10             | 20               | 16 | 100           |
|            | 14-9          | 21             | 17               | 15 | 86            |
|            | 19-1          | 10             | 19               | 15 | 80            |
|            | 19-3          | 11             | 19               | 14 | 91            |
|            | 19-5          | 11             | 19               | 16 | 82            |
|            |               | <b>Average</b> |                  |    |               |
| F6         | 2-8-3         | 1              | 19               | 16 | 0             |
|            | 2-8-5         | 9              | 20               | 16 | 56            |
|            | 5-1-1-1 5p ** | 26             | 17               | 16 | 36            |
|            | 5-1-1-1 4p**  | 25             | 17               | 16 | 16            |
|            | 5-1-6-1       | 26             | 16               | 16 | 77            |
|            | 5-1-6-2       | 6              | 13               | 14 | 100           |
|            | 5-1-6-4       | 13             | 15               | 16 | 31            |
|            | 6-1-2         | 8              | 20               | 16 | 50            |
|            | 6-1-6         | 7              | 20               | 16 | 100           |
|            | 6-1-8         | 8              | 23               | 16 | 38            |
|            | 6-1-9         | 4              | 20               | 16 | 50            |
|            | 12-19-1       | 10             | 19               | 16 | 20            |
|            | 12-19-9       | 1              | 20               | 16 | 0             |

|                |   |    |    |           |
|----------------|---|----|----|-----------|
| <b>14-4-3</b>  | 2 | 18 | 16 | 0         |
| <b>14-4-4</b>  | 7 | 17 | 15 | 71        |
| <b>19-1-4</b>  | 7 | 20 | 16 | 43        |
| <b>19-1-9</b>  | 6 | 19 | 16 | 17        |
| <b>19-1-10</b> | 7 | 21 | 16 | 43        |
| <b>Average</b> |   |    |    | <b>41</b> |

| <b>Generation</b> | <b>Plant number</b> | <b>Cells analyzed</b> | <b>Modal chromosome numbers</b> |           | <b>Aneuploid (%)</b> |
|-------------------|---------------------|-----------------------|---------------------------------|-----------|----------------------|
|                   |                     |                       | <b>At</b>                       | <b>Aa</b> |                      |
| <b>F7</b>         | <b>6-1-2-1</b>      | 7                     | 18                              | 17        | 57                   |
|                   | <b>6-1-2-2</b>      | 24                    | 21                              | 15        | 29                   |
|                   | <b>6-1-2-3</b>      | 26                    | 21                              | 16        | 58                   |
|                   | <b>6-1-2-4</b>      | 6                     | 20                              | 16        | 50                   |
|                   | <b>6-1-6-2</b>      | 11                    | 20                              | 16        | 18                   |
|                   | <b>6-1-6-4</b>      | 4                     | 21                              | 16        | 50                   |
|                   | <b>6-1-8-1</b>      | 38                    | 16                              | 16        | 84                   |
|                   | <b>6-1-8-2</b>      | 9                     | 18                              | 11        | 89                   |
|                   | <b>6-1-8-3</b>      | 13                    | 21                              | 16        | 85                   |
|                   | <b>6-1-8-4</b>      | 28                    | 23                              | 16        | 46                   |
|                   | <b>6-1-9-1</b>      | 28                    | 18                              | 14        | 93                   |
|                   | <b>6-1-9-3</b>      | 13                    | 20                              | 16        | 92                   |
|                   | <b>6-1-9-4</b>      | 11                    | 19                              | 15        | 82                   |
|                   | <b>12-1-9-4</b>     | 38                    | 17                              | 14        | 95                   |
|                   | <b>12-3-5-1</b>     | 9                     | 19                              | 16        | 78                   |
|                   | <b>12-19-1-1</b>    | 33                    | 18                              | 16        | 91                   |
|                   | <b>12-19-1-2</b>    | 27                    | 17                              | 16        | 81                   |
|                   | <b>12-19-1-4</b>    | 15                    | 19                              | 16        | 27                   |
|                   | <b>12-19-1-5</b>    | 11                    | 19                              | 15        | 27                   |
|                   | <b>12-19-9-1</b>    | 7                     | 20                              | 16        | 29                   |
|                   | <b>14-3-3-1</b>     | 17                    | 16                              | 14        | 88                   |
|                   | <b>14-4-4-1</b>     | 25                    | 16                              | 15        | 76                   |
|                   | <b>19-1-9-1</b>     | 35                    | 16                              | 14        | 92                   |
|                   | <b>19-1-9-2</b>     | 9                     | 14                              | 12        | 67                   |
|                   | <b>19-1-9-3</b>     | 26                    | 16                              | 15        | 77                   |
|                   | <b>19-1-9-4</b>     | 28                    | 16                              | 16        | 82                   |
|                   | <b>19-1-9-5</b>     | 20                    | 16                              | 16        | 80                   |

|                  |    |    |    |           |
|------------------|----|----|----|-----------|
| <b>19-1-9-6</b>  | 20 | 16 | 12 | 90        |
| <b>19-1-9-7</b>  | 17 | 18 | 15 | 76        |
| <b>19-1-9-9</b>  | 15 | 17 | 16 | 73        |
| <b>19-1-10-1</b> | 40 | 20 | 16 | 70        |
| <b>19-1-10-2</b> | 16 | 20 | 16 | 69        |
| <b>Average</b>   |    |    |    | <b>69</b> |

\* Modal chromosome numbers were determined as the most common chromosome number for *At* and *Aa* individually for each plant.

\*\* 4p and 5p denotes cells from different floral clusters of the same plant that either produced 5-petaled or 4-petaled flowers.

**Table S3 Complete FISH Data Set**

| Generation | Plant Number | Cell Number | At | Aa | Total Number |
|------------|--------------|-------------|----|----|--------------|
| F3         | 2-1          | 1           | 18 | 15 | 33           |
|            |              | 2           | 22 | 21 | 43           |
|            |              | 3           | 17 | 14 | 31           |
|            |              | 4           | 14 | 13 | 27           |
|            |              | 5           | 22 | 20 | 42           |
|            |              | 6           | 19 | 12 | 31           |
|            |              | 7           | 16 | 16 | 32           |
|            |              | 8           | 18 | 15 | 33           |
|            |              | 9           | 18 | 16 | 34           |
|            |              | 10          | 17 | 16 | 33           |
|            | 2-5          | 1           | 18 | 18 | 36           |
|            |              | 2           | 19 | 14 | 33           |
|            |              | 3           | 18 | 15 | 33           |
|            |              | 4           | 18 | 15 | 33           |
|            |              | 5           | 17 | 13 | 30           |
|            |              | 6           | 20 | 16 | 36           |
|            |              | 7           | 18 | 16 | 34           |
|            |              | 8           | 19 | 16 | 35           |
|            |              | 9           | 20 | 15 | 35           |
|            |              | 10          | 16 | 16 | 32           |
|            | 2-8          | 1           | 19 | 17 | 36           |
|            |              | 2           | 18 | 13 | 31           |
|            |              | 3           | 19 | 16 | 35           |
|            |              | 4           | 15 | 15 | 30           |
|            |              | 5           | 19 | 15 | 34           |
|            |              | 6           | 17 | 16 | 33           |
|            |              | 7           | 16 | 13 | 29           |
|            |              | 8           | 17 | 18 | 35           |
|            |              | 9           | 16 | 18 | 34           |
|            |              | 10          | 11 | 13 | 24           |
|            |              | 11          | 18 | 16 | 34           |
|            | 5-1          | 1           | 17 | 15 | 32           |
|            |              | 2           | 17 | 12 | 29           |
|            |              | 3           | 18 | 16 | 34           |
|            |              | 4           | 16 | 14 | 30           |
|            |              | 5           | 17 | 12 | 29           |

|       |    |    |    |    |
|-------|----|----|----|----|
|       | 6  | 20 | 16 | 36 |
|       | 7  | 19 | 14 | 33 |
|       | 8  | 16 | 11 | 27 |
|       | 9  | 18 | 15 | 33 |
|       | 10 | 19 | 16 | 35 |
| <hr/> |    |    |    |    |
| 5-2   | 1  | 18 | 16 | 34 |
|       | 2  | 17 | 12 | 29 |
|       | 3  | 17 | 14 | 31 |
|       | 4  | 23 | 16 | 39 |
|       | 5  | 20 | 16 | 36 |
|       | 6  | 13 | 14 | 27 |
|       | 7  | 18 | 14 | 32 |
|       | 8  | 17 | 16 | 33 |
|       | 9  | 16 | 14 | 30 |
|       | 10 | 17 | 14 | 31 |
| <hr/> |    |    |    |    |
| 5-3   | 1  | 18 | 16 | 34 |
|       | 2  | 19 | 16 | 35 |
|       | 3  | 19 | 16 | 35 |
|       | 4  | 18 | 16 | 34 |
|       | 5  | 17 | 16 | 33 |
|       | 6  | 17 | 16 | 33 |
|       | 7  | 19 | 16 | 35 |
|       | 8  | 19 | 15 | 34 |
|       | 9  | 18 | 16 | 34 |
|       | 10 | 17 | 16 | 33 |
|       | 11 | 19 | 16 | 35 |
|       | 12 | 17 | 16 | 33 |
|       | 13 | 17 | 16 | 33 |
|       | 14 | 19 | 16 | 35 |
| <hr/> |    |    |    |    |
| 6-1   | 1  | 21 | 13 | 34 |
|       | 2  | 19 | 16 | 35 |
|       | 3  | 19 | 16 | 35 |
|       | 4  | 20 | 16 | 36 |
|       | 5  | 19 | 16 | 35 |
|       | 6  | 19 | 11 | 30 |
|       | 7  | 18 | 12 | 30 |
|       | 8  | 19 | 15 | 34 |
|       | 9  | 19 | 17 | 36 |
|       | 10 | 18 | 16 | 34 |

|       |    |    |    |    |
|-------|----|----|----|----|
|       | 11 | 20 | 17 | 37 |
| 6-5   | 1  | 14 | 14 | 28 |
|       | 2  | 18 | 16 | 34 |
|       | 3  | 15 | 17 | 32 |
|       | 4  | 15 | 16 | 31 |
|       | 5  | 13 | 16 | 29 |
|       | 6  | 17 | 15 | 32 |
|       | 7  | 16 | 16 | 32 |
|       | 8  | 17 | 16 | 33 |
|       | 9  | 15 | 15 | 30 |
|       | 10 | 16 | 16 | 32 |
|       | 11 | 16 | 16 | 32 |
| 6-10  | 1  | 20 | 13 | 33 |
|       | 2  | 19 | 14 | 33 |
|       | 3  | 19 | 17 | 36 |
|       | 4  | 20 | 16 | 36 |
|       | 5  | 16 | 12 | 28 |
|       | 6  | 18 | 15 | 33 |
|       | 7  | 15 | 17 | 32 |
|       | 8  | 20 | 17 | 37 |
|       | 9  | 16 | 15 | 31 |
|       | 10 | 16 | 13 | 29 |
|       | 11 | 19 | 13 | 32 |
| 12-3  | 1  | 18 | 15 | 33 |
|       | 2  | 20 | 16 | 36 |
|       | 3  | 17 | 16 | 33 |
|       | 4  | 19 | 15 | 34 |
|       | 5  | 20 | 14 | 34 |
|       | 6  | 15 | 17 | 32 |
|       | 7  | 18 | 13 | 31 |
|       | 8  | 19 | 15 | 34 |
|       | 9  | 17 | 16 | 33 |
|       | 10 | 17 | 17 | 34 |
|       | 11 | 17 | 16 | 33 |
|       | 12 | 20 | 15 | 35 |
| 12-11 | 1  | 18 | 18 | 36 |
|       | 2  | 19 | 13 | 32 |
|       | 3  | 20 | 15 | 35 |
|       | 4  | 20 | 16 | 36 |



|       |    |    |    |    |
|-------|----|----|----|----|
|       | 5  | 19 | 16 | 35 |
|       | 6  | 19 | 16 | 35 |
|       | 7  | 19 | 16 | 35 |
|       | 8  | 17 | 15 | 32 |
|       | 9  | 18 | 14 | 32 |
|       | 10 | 17 | 16 | 33 |
| <hr/> |    |    |    |    |
| 12-19 | 1  | 19 | 15 | 34 |
|       | 2  | 17 | 15 | 32 |
|       | 3  | 19 | 16 | 35 |
|       | 4  | 19 | 16 | 35 |
|       | 5  | 19 | 16 | 35 |
|       | 6  | 19 | 16 | 35 |
|       | 7  | 18 | 15 | 33 |
|       | 8  | 17 | 15 | 32 |
|       | 9  | 20 | 16 | 36 |
|       | 10 | 18 | 16 | 34 |
|       | 11 | 17 | 15 | 32 |
| <hr/> |    |    |    |    |
| 14-2  | 1  | 13 | 12 | 25 |
|       | 2  | 17 | 13 | 30 |
|       | 3  | 16 | 14 | 30 |
|       | 4  | 13 | 18 | 31 |
|       | 5  | 18 | 15 | 33 |
|       | 6  | 18 | 15 | 33 |
|       | 7  | 18 | 15 | 33 |
|       | 8  | 16 | 15 | 31 |
|       | 9  | 16 | 15 | 31 |
|       | 10 | 16 | 16 | 32 |
| <hr/> |    |    |    |    |
| 14-4  | 1  | 20 | 14 | 34 |
|       | 2  | 20 | 17 | 37 |
|       | 3  | 21 | 16 | 37 |
|       | 4  | 20 | 18 | 38 |
|       | 5  | 18 | 16 | 34 |
|       | 6  | 17 | 17 | 34 |
|       | 7  | 19 | 15 | 34 |
|       | 8  | 19 | 16 | 35 |
|       | 9  | 17 | 16 | 33 |
|       | 10 | 18 | 15 | 33 |
| <hr/> |    |    |    |    |
| 14-9  | 1  | 19 | 15 | 34 |
|       | 2  | 19 | 16 | 35 |

|       |    |    |    |    |
|-------|----|----|----|----|
|       | 3  | 17 | 16 | 33 |
|       | 4  | 18 | 15 | 33 |
|       | 5  | 18 | 15 | 33 |
|       | 6  | 22 | 15 | 37 |
|       | 7  | 20 | 14 | 34 |
|       | 8  | 20 | 16 | 36 |
|       | 9  | 17 | 15 | 32 |
|       | 10 | 16 | 14 | 30 |
|       | 11 | 19 | 16 | 35 |
|       | 12 | 17 | 13 | 30 |
|       | 13 | 18 | 15 | 33 |
|       | 14 | 17 | 15 | 32 |
|       | 15 | 18 | 15 | 33 |
|       | 16 | 17 | 15 | 32 |
|       | 17 | 17 | 13 | 30 |
|       | 18 | 18 | 13 | 31 |
|       | 19 | 19 | 14 | 33 |
|       | 20 | 17 | 16 | 33 |
|       | 21 | 19 | 15 | 34 |
| <hr/> |    |    |    |    |
| 19-1  | 1  | 17 | 15 | 32 |
|       | 2  | 16 | 16 | 32 |
|       | 3  | 18 | 15 | 33 |
|       | 4  | 18 | 15 | 33 |
|       | 5  | 19 | 15 | 34 |
|       | 6  | 16 | 16 | 32 |
|       | 7  | 19 | 15 | 34 |
|       | 8  | 19 | 14 | 33 |
|       | 9  | 17 | 16 | 33 |
|       | 10 | 16 | 14 | 30 |
| <hr/> |    |    |    |    |
| 19-3  | 1  | 18 | 14 | 32 |
|       | 2  | 17 | 14 | 31 |
|       | 3  | 15 | 11 | 26 |
|       | 4  | 19 | 12 | 31 |
|       | 5  | 19 | 16 | 35 |
|       | 6  | 17 | 15 | 32 |
|       | 7  | 15 | 15 | 30 |
|       | 8  | 15 | 13 | 28 |
|       | 9  | 19 | 14 | 33 |
|       | 10 | 19 | 16 | 35 |

|    |            |    |    |    |    |
|----|------------|----|----|----|----|
|    |            | 11 | 17 | 15 | 32 |
|    | 19-5       | 1  | 21 | 25 | 46 |
|    |            | 2  | 19 | 16 | 35 |
|    |            | 3  | 16 | 15 | 31 |
|    |            | 4  | 19 | 16 | 35 |
|    |            | 5  | 16 | 14 | 30 |
|    |            | 6  | 20 | 13 | 33 |
|    |            | 7  | 17 | 12 | 29 |
|    |            | 8  | 18 | 14 | 32 |
|    |            | 9  | 20 | 15 | 35 |
|    |            | 10 | 17 | 15 | 32 |
|    |            | 11 | 21 | 15 | 36 |
| F6 | 2-8-3      | 1  | 19 | 16 | 35 |
|    | 2-8-5      | 1  | 17 | 14 | 31 |
|    |            | 2  | 19 | 16 | 35 |
|    |            | 3  | 20 | 16 | 36 |
|    |            | 4  | 20 | 16 | 36 |
|    |            | 5  | 20 | 16 | 36 |
|    |            | 6  | 20 | 16 | 36 |
|    |            | 7  | 20 | 15 | 35 |
|    |            | 8  | 20 | 16 | 36 |
|    |            | 9  | 18 | 16 | 34 |
|    | 5-1-1-1 5p | 1  | 17 | 15 | 32 |
|    |            | 2  | 17 | 16 | 33 |
|    |            | 3  | 17 | 16 | 33 |
|    |            | 4  | 17 | 16 | 33 |
|    |            | 5  | 18 | 16 | 34 |
|    |            | 6  | 17 | 16 | 33 |
|    |            | 7  | 17 | 15 | 32 |
|    |            | 8  | 20 | 16 | 36 |
|    |            | 9  | 17 | 16 | 33 |
|    |            | 10 | 17 | 16 | 33 |
|    |            | 11 | 17 | 16 | 33 |
|    |            | 12 | 17 | 15 | 32 |
|    |            | 13 | 17 | 16 | 33 |
|    |            | 14 | 17 | 16 | 33 |
|    |            | 15 | 17 | 16 | 33 |
|    |            | 16 | 17 | 16 | 33 |
|    |            | 17 | 17 | 16 | 33 |

|            |    |    |    |    |
|------------|----|----|----|----|
|            | 18 | 17 | 16 | 33 |
|            | 19 | 17 | 16 | 33 |
|            | 20 | 17 | 16 | 33 |
|            | 21 | 17 | 16 | 33 |
|            | 22 | 16 | 15 | 31 |
|            | 23 | 17 | 15 | 32 |
|            | 24 | 19 | 15 | 34 |
|            | 25 | 14 | 10 | 24 |
|            | 26 | 13 | 10 | 23 |
| <hr/>      |    |    |    |    |
| 5-1-1-1 4p | 1  | 17 | 16 | 33 |
|            | 2  | 17 | 16 | 33 |
|            | 3  | 17 | 16 | 33 |
|            | 4  | 17 | 16 | 33 |
|            | 5  | 17 | 16 | 33 |
|            | 6  | 17 | 16 | 33 |
|            | 7  | 17 | 16 | 33 |
|            | 8  | 17 | 16 | 33 |
|            | 9  | 17 | 16 | 33 |
|            | 10 | 17 | 16 | 33 |
|            | 11 | 15 | 16 | 31 |
|            | 12 | 17 | 16 | 33 |
|            | 13 | 17 | 16 | 33 |
|            | 14 | 17 | 16 | 33 |
|            | 15 | 17 | 16 | 33 |
|            | 16 | 17 | 16 | 33 |
|            | 17 | 17 | 16 | 33 |
|            | 18 | 17 | 16 | 33 |
|            | 19 | 17 | 16 | 33 |
|            | 20 | 17 | 16 | 33 |
|            | 21 | 17 | 16 | 33 |
|            | 22 | 17 | 16 | 33 |
|            | 23 | 17 | 15 | 32 |
|            | 24 | 17 | 12 | 29 |
|            | 25 | 20 | 14 | 34 |
| <hr/>      |    |    |    |    |
| 5-1-6-1    | 1  | 14 | 16 | 30 |
|            | 2  | 13 | 16 | 29 |
|            | 3  | 14 | 12 | 26 |
|            | 4  | 13 | 14 | 27 |
|            | 5  | 14 | 16 | 30 |

|         |    |    |    |    |
|---------|----|----|----|----|
| 6       | 14 | 14 | 28 |    |
| 7       | 15 | 12 | 27 |    |
| 8       | 16 | 15 | 31 |    |
| 9       | 15 | 16 | 31 |    |
| 10      | 14 | 14 | 28 |    |
| 11      | 16 | 12 | 28 |    |
| 12      | 16 | 16 | 32 |    |
| 13      | 14 | 15 | 29 |    |
| 14      | 15 | 12 | 27 |    |
| 15      | 16 | 16 | 32 |    |
| 16      | 13 | 14 | 27 |    |
| 17      | 14 | 14 | 28 |    |
| 18      | 14 | 13 | 27 |    |
| 19      | 14 | 12 | 26 |    |
| 20      | 16 | 14 | 30 |    |
| 21      | 15 | 13 | 28 |    |
| 22      | 15 | 17 | 32 |    |
| 23      | 16 | 16 | 32 |    |
| 24      | 16 | 16 | 32 |    |
| 25      | 16 | 16 | 32 |    |
| 26      | 16 | 16 | 32 |    |
| <hr/>   |    |    |    |    |
| 5-1-6-2 | 1  | 10 | 16 | 26 |
|         | 2  | 16 | 14 | 30 |
|         | 3  | 13 | 17 | 30 |
|         | 4  | 13 | 12 | 25 |
|         | 5  | 14 | 16 | 30 |
|         | 6  | 14 | 14 | 28 |
| <hr/>   |    |    |    |    |
| 5-1-6-4 | 1  | 14 | 14 | 28 |
|         | 2  | 15 | 16 | 31 |
|         | 3  | 14 | 14 | 28 |
|         | 4  | 15 | 17 | 32 |
|         | 5  | 15 | 16 | 31 |
|         | 6  | 15 | 16 | 31 |
|         | 7  | 15 | 16 | 31 |
|         | 8  | 15 | 16 | 31 |
|         | 9  | 16 | 16 | 32 |
|         | 10 | 15 | 16 | 31 |
|         | 11 | 15 | 16 | 31 |
|         | 12 | 15 | 16 | 31 |

|         |    |    |    |    |
|---------|----|----|----|----|
|         | 13 | 15 | 16 | 31 |
| 6-1-2   | 1  | 21 | 15 | 36 |
|         | 2  | 19 | 16 | 35 |
|         | 3  | 19 | 16 | 35 |
|         | 4  | 20 | 16 | 36 |
|         | 5  | 20 | 16 | 36 |
|         | 6  | 20 | 16 | 36 |
|         | 7  | 20 | 17 | 37 |
|         | 8  | 20 | 16 | 36 |
| 6-1-6   | 1  | 17 | 15 | 32 |
|         | 2  | 19 | 16 | 35 |
|         | 3  | 19 | 15 | 34 |
|         | 4  | 20 | 16 | 36 |
|         | 5  | 20 | 16 | 36 |
|         | 6  | 19 | 16 | 35 |
|         | 7  | 17 | 14 | 31 |
| 6-1-8   | 1  | 21 | 16 | 37 |
|         | 2  | 23 | 16 | 39 |
|         | 3  | 21 | 16 | 37 |
|         | 4  | 23 | 16 | 39 |
|         | 5  | 23 | 16 | 39 |
|         | 6  | 23 | 15 | 38 |
|         | 7  | 23 | 16 | 39 |
|         | 8  | 23 | 16 | 39 |
| 6-1-9   | 1  | 20 | 16 | 36 |
|         | 2  | 21 | 16 | 37 |
|         | 3  | 20 | 16 | 36 |
|         | 4  | 21 | 16 | 37 |
| 12-19-1 | 1  | 18 | 16 | 34 |
|         | 2  | 19 | 16 | 35 |
|         | 3  | 18 | 16 | 34 |
|         | 4  | 19 | 16 | 35 |
|         | 5  | 19 | 16 | 35 |
|         | 6  | 19 | 16 | 35 |
|         | 7  | 19 | 16 | 35 |
|         | 8  | 19 | 16 | 35 |
|         | 9  | 19 | 16 | 35 |
|         | 10 | 19 | 16 | 35 |
| 12-19-9 | 1  | 20 | 16 | 36 |

|       |         |   |    |    |    |
|-------|---------|---|----|----|----|
|       | 14-4-3  | 1 | 18 | 16 | 34 |
|       |         | 2 | 18 | 16 | 34 |
| <hr/> |         |   |    |    |    |
|       | 14-4-4  | 1 | 16 | 15 | 31 |
|       |         | 2 | 16 | 15 | 31 |
|       |         | 3 | 17 | 15 | 32 |
|       |         | 4 | 14 | 11 | 25 |
|       |         | 5 | 16 | 15 | 31 |
|       |         | 6 | 17 | 15 | 32 |
|       |         | 7 | 17 | 15 | 32 |
| <hr/> |         |   |    |    |    |
|       | 19-1-4  | 1 | 19 | 16 | 35 |
|       |         | 2 | 20 | 16 | 36 |
|       |         | 3 | 20 | 16 | 36 |
|       |         | 4 | 20 | 16 | 36 |
|       |         | 5 | 20 | 16 | 36 |
|       |         | 6 | 20 | 16 | 36 |
|       |         | 7 | 20 | 16 | 36 |
| <hr/> |         |   |    |    |    |
|       | 19-1-9  | 1 | 19 | 16 | 35 |
|       |         | 2 | 18 | 16 | 34 |
|       |         | 3 | 19 | 16 | 35 |
|       |         | 4 | 19 | 16 | 35 |
|       |         | 5 | 19 | 16 | 35 |
|       |         | 6 | 19 | 16 | 35 |
| <hr/> |         |   |    |    |    |
|       | 19-1-10 | 1 | 21 | 16 | 37 |
|       |         | 2 | 19 | 16 | 35 |
|       |         | 3 | 21 | 16 | 37 |
|       |         | 4 | 21 | 16 | 37 |
|       |         | 5 | 21 | 16 | 37 |
|       |         | 6 | 21 | 16 | 37 |
|       |         | 7 | 20 | 16 | 36 |
| <hr/> |         |   |    |    |    |
| F7    | 6-1-2-1 | 1 | 19 | 19 | 38 |
|       |         | 2 | 18 | 17 | 35 |
|       |         | 3 | 18 | 17 | 35 |
|       |         | 4 | 19 | 17 | 36 |
|       |         | 5 | 18 | 17 | 35 |
|       |         | 6 | 19 | 16 | 35 |
|       |         | 7 | 17 | 17 | 34 |
| <hr/> |         |   |    |    |    |
|       | 6-1-2-2 | 1 | 21 | 15 | 36 |
|       |         | 2 | 20 | 15 | 35 |
|       |         | 3 | 20 | 14 | 34 |

|         |    |    |    |    |
|---------|----|----|----|----|
|         | 4  | 21 | 15 | 36 |
|         | 5  | 21 | 15 | 36 |
|         | 6  | 21 | 16 | 37 |
|         | 7  | 21 | 13 | 34 |
|         | 8  | 21 | 15 | 36 |
|         | 9  | 21 | 15 | 36 |
|         | 10 | 22 | 15 | 37 |
|         | 11 | 21 | 15 | 36 |
|         | 12 | 21 | 15 | 36 |
|         | 13 | 21 | 15 | 36 |
|         | 14 | 21 | 15 | 36 |
|         | 15 | 20 | 15 | 35 |
|         | 16 | 21 | 15 | 36 |
|         | 17 | 21 | 15 | 36 |
|         | 18 | 21 | 15 | 36 |
|         | 19 | 22 | 15 | 37 |
|         | 20 | 21 | 15 | 36 |
|         | 21 | 21 | 15 | 36 |
|         | 22 | 21 | 15 | 36 |
|         | 23 | 21 | 15 | 36 |
|         | 24 | 21 | 15 | 36 |
| <hr/>   |    |    |    |    |
| 6-1-2-3 | 1  | 22 | 17 | 39 |
|         | 2  | 21 | 16 | 37 |
|         | 3  | 22 | 15 | 37 |
|         | 4  | 21 | 16 | 37 |
|         | 5  | 21 | 16 | 37 |
|         | 6  | 23 | 16 | 39 |
|         | 7  | 21 | 17 | 38 |
|         | 8  | 22 | 16 | 38 |
|         | 9  | 22 | 16 | 38 |
|         | 10 | 22 | 16 | 38 |
|         | 11 | 22 | 16 | 38 |
|         | 12 | 22 | 16 | 38 |
|         | 13 | 22 | 16 | 38 |
|         | 14 | 21 | 16 | 37 |
|         | 15 | 21 | 16 | 37 |
|         | 16 | 21 | 16 | 37 |
|         | 17 | 21 | 16 | 37 |
|         | 18 | 22 | 15 | 37 |



|         |    |    |    |    |
|---------|----|----|----|----|
|         | 19 | 22 | 16 | 38 |
|         | 20 | 21 | 16 | 37 |
|         | 21 | 22 | 16 | 38 |
|         | 22 | 23 | 17 | 40 |
|         | 23 | 21 | 15 | 36 |
|         | 24 | 21 | 16 | 37 |
|         | 25 | 21 | 16 | 37 |
|         | 26 | 21 | 16 | 37 |
| <hr/>   |    |    |    |    |
| 6-1-2-4 | 1  | 19 | 16 | 35 |
|         | 2  | 20 | 16 | 36 |
|         | 3  | 20 | 16 | 36 |
|         | 4  | 20 | 16 | 36 |
|         | 5  | 19 | 16 | 35 |
|         | 6  | 19 | 15 | 34 |
| <hr/>   |    |    |    |    |
| 6-1-6-2 | 1  | 20 | 16 | 36 |
|         | 2  | 20 | 16 | 36 |
|         | 3  | 20 | 16 | 36 |
|         | 4  | 19 | 16 | 35 |
|         | 5  | 18 | 16 | 34 |
|         | 6  | 20 | 16 | 36 |
|         | 7  | 20 | 16 | 36 |
|         | 8  | 20 | 16 | 36 |
|         | 9  | 20 | 16 | 36 |
|         | 10 | 20 | 16 | 36 |
|         | 11 | 20 | 16 | 36 |
| <hr/>   |    |    |    |    |
| 6-1-6-4 | 1  | 22 | 16 | 38 |
|         | 2  | 17 | 13 | 30 |
|         | 3  | 21 | 16 | 37 |
|         | 4  | 21 | 16 | 37 |
| <hr/>   |    |    |    |    |
| 6-1-8-1 | 1  | 14 | 13 | 27 |
|         | 2  | 16 | 14 | 30 |
|         | 3  | 16 | 16 | 32 |
|         | 4  | 14 | 12 | 26 |
|         | 5  | 14 | 14 | 28 |
|         | 6  | 16 | 16 | 32 |
|         | 7  | 16 | 16 | 32 |
|         | 8  | 16 | 16 | 32 |
|         | 9  | 15 | 16 | 31 |
|         | 10 | 17 | 14 | 31 |

|         |    |    |    |    |
|---------|----|----|----|----|
| 11      | 19 | 16 | 35 |    |
| 12      | 16 | 13 | 29 |    |
| 13      | 14 | 15 | 29 |    |
| 14      | 15 | 15 | 30 |    |
| 15      | 16 | 14 | 30 |    |
| 16      | 16 | 14 | 30 |    |
| 17      | 16 | 16 | 32 |    |
| 18      | 18 | 15 | 33 |    |
| 19      | 18 | 16 | 34 |    |
| 20      | 20 | 14 | 34 |    |
| 21      | 20 | 16 | 36 |    |
| 22      | 16 | 16 | 32 |    |
| 23      | 12 | 11 | 23 |    |
| 24      | 17 | 14 | 31 |    |
| 25      | 19 | 15 | 34 |    |
| 26      | 20 | 16 | 36 |    |
| 27      | 18 | 15 | 33 |    |
| 28      | 18 | 13 | 31 |    |
| 29      | 18 | 13 | 31 |    |
| 30      | 18 | 16 | 34 |    |
| 31      | 18 | 16 | 34 |    |
| 32      | 20 | 16 | 36 |    |
| 33      | 20 | 16 | 36 |    |
| 34      | 23 | 16 | 39 |    |
| 35      | 20 | 16 | 36 |    |
| 36      | 20 | 16 | 36 |    |
| 37      | 20 | 15 | 35 |    |
| 38      | 20 | 16 | 36 |    |
| <hr/>   |    |    |    |    |
| 6-1-8-2 | 1  | 18 | 13 | 31 |
|         | 2  | 20 | 14 | 34 |
|         | 3  | 16 | 11 | 27 |
|         | 4  | 17 | 8  | 25 |
|         | 5  | 18 | 11 | 29 |
|         | 6  | 19 | 14 | 33 |
|         | 7  | 21 | 16 | 37 |
|         | 8  | 16 | 15 | 31 |
|         | 9  | 18 | 17 | 35 |
| <hr/>   |    |    |    |    |
| 6-1-8-3 | 1  | 20 | 16 | 36 |
|         | 2  | 17 | 14 | 31 |

|         |    |    |    |    |
|---------|----|----|----|----|
|         | 3  | 20 | 14 | 34 |
|         | 4  | 23 | 15 | 38 |
|         | 5  | 18 | 14 | 32 |
|         | 6  | 19 | 15 | 34 |
|         | 7  | 22 | 16 | 38 |
|         | 8  | 23 | 16 | 39 |
|         | 9  | 21 | 14 | 35 |
|         | 10 | 22 | 16 | 38 |
|         | 11 | 21 | 16 | 37 |
|         | 12 | 22 | 11 | 33 |
|         | 13 | 21 | 16 | 37 |
| 6-1-8-4 | 1  | 21 | 16 | 37 |
|         | 2  | 20 | 15 | 35 |
|         | 3  | 19 | 14 | 33 |
|         | 4  | 18 | 12 | 30 |
|         | 5  | 21 | 15 | 36 |
|         | 6  | 16 | 16 | 32 |
|         | 7  | 21 | 14 | 35 |
|         | 8  | 20 | 16 | 36 |
|         | 9  | 18 | 15 | 33 |
|         | 10 | 20 | 16 | 36 |
|         | 11 | 22 | 15 | 37 |
|         | 12 | 22 | 14 | 36 |
|         | 13 | 18 | 15 | 33 |
|         | 14 | 23 | 16 | 39 |
|         | 15 | 23 | 16 | 39 |
|         | 16 | 23 | 16 | 39 |
|         | 17 | 23 | 16 | 39 |
|         | 18 | 23 | 16 | 39 |
|         | 19 | 23 | 16 | 39 |
|         | 20 | 23 | 16 | 39 |
|         | 21 | 23 | 16 | 39 |
|         | 22 | 23 | 16 | 39 |
|         | 23 | 23 | 16 | 39 |
|         | 24 | 23 | 16 | 39 |
|         | 25 | 23 | 16 | 39 |
|         | 26 | 23 | 16 | 39 |
|         | 27 | 23 | 16 | 39 |
|         | 28 | 23 | 16 | 39 |

|         |    |    |    |    |
|---------|----|----|----|----|
| 6-1-9-1 | 1  | 20 | 16 | 36 |
|         | 2  | 19 | 13 | 32 |
|         | 3  | 15 | 14 | 29 |
|         | 4  | 18 | 12 | 30 |
|         | 5  | 18 | 15 | 33 |
|         | 6  | 14 | 13 | 27 |
|         | 7  | 18 | 16 | 34 |
|         | 8  | 18 | 12 | 30 |
|         | 9  | 18 | 16 | 34 |
|         | 10 | 16 | 15 | 31 |
|         | 11 | 17 | 14 | 31 |
|         | 12 | 19 | 14 | 33 |
|         | 13 | 20 | 13 | 33 |
|         | 14 | 19 | 16 | 35 |
|         | 15 | 18 | 14 | 32 |
|         | 16 | 15 | 12 | 27 |
|         | 17 | 18 | 14 | 32 |
|         | 18 | 18 | 15 | 33 |
|         | 19 | 16 | 16 | 32 |
|         | 20 | 16 | 13 | 29 |
|         | 21 | 13 | 9  | 22 |
|         | 22 | 16 | 12 | 28 |
|         | 23 | 16 | 14 | 30 |
|         | 24 | 17 | 14 | 31 |
|         | 25 | 17 | 13 | 30 |
|         | 26 | 17 | 15 | 32 |
|         | 27 | 16 | 14 | 30 |
|         | 28 | 17 | 14 | 31 |
| 6-1-9-3 | 1  | 20 | 15 | 35 |
|         | 2  | 20 | 16 | 36 |
|         | 3  | 15 | 16 | 31 |
|         | 4  | 20 | 14 | 34 |
|         | 5  | 18 | 16 | 34 |
|         | 6  | 19 | 15 | 34 |
|         | 7  | 19 | 17 | 36 |
|         | 8  | 17 | 12 | 29 |
|         | 9  | 18 | 15 | 33 |
|         | 10 | 20 | 13 | 33 |
|         | 11 | 21 | 16 | 37 |

|          |    |    |    |    |
|----------|----|----|----|----|
|          | 12 | 19 | 14 | 33 |
|          | 13 | 21 | 16 | 37 |
| 6-1-9-4  | 1  | 19 | 15 | 34 |
|          | 2  | 19 | 15 | 34 |
|          | 3  | 14 | 15 | 29 |
|          | 4  | 14 | 15 | 29 |
|          | 5  | 10 | 6  | 16 |
|          | 6  | 9  | 7  | 16 |
|          | 7  | 19 | 15 | 34 |
|          | 8  | 17 | 13 | 30 |
|          | 9  | 18 | 16 | 34 |
|          | 10 | 16 | 14 | 30 |
|          | 11 | 18 | 16 | 34 |
| 12-1-9-4 | 1  | 12 | 6  | 18 |
|          | 2  | 17 | 12 | 29 |
|          | 3  | 13 | 12 | 25 |
|          | 4  | 19 | 16 | 35 |
|          | 5  | 18 | 16 | 34 |
|          | 6  | 18 | 15 | 33 |
|          | 7  | 17 | 14 | 31 |
|          | 8  | 17 | 15 | 32 |
|          | 9  | 17 | 15 | 32 |
|          | 10 | 15 | 12 | 27 |
|          | 11 | 20 | 16 | 36 |
|          | 12 | 15 | 10 | 25 |
|          | 13 | 19 | 14 | 33 |
|          | 14 | 17 | 12 | 29 |
|          | 15 | 14 | 13 | 27 |
|          | 16 | 17 | 13 | 30 |
|          | 17 | 16 | 11 | 27 |
|          | 18 | 18 | 14 | 32 |
|          | 19 | 13 | 12 | 25 |
|          | 20 | 17 | 15 | 32 |
|          | 21 | 19 | 14 | 33 |
|          | 22 | 20 | 15 | 35 |
|          | 23 | 17 | 14 | 31 |
|          | 24 | 17 | 13 | 30 |
|          | 25 | 17 | 12 | 29 |
|          | 26 | 17 | 13 | 30 |

|           |    |    |    |    |
|-----------|----|----|----|----|
|           | 27 | 15 | 14 | 29 |
|           | 28 | 18 | 12 | 30 |
|           | 29 | 17 | 15 | 32 |
|           | 30 | 16 | 14 | 30 |
|           | 31 | 14 | 16 | 30 |
|           | 32 | 17 | 15 | 32 |
|           | 33 | 18 | 15 | 33 |
|           | 34 | 14 | 11 | 25 |
|           | 35 | 19 | 16 | 35 |
|           | 36 | 15 | 14 | 29 |
|           | 37 | 17 | 13 | 30 |
|           | 38 | 20 | 16 | 36 |
| <hr/>     |    |    |    |    |
| 12-3-5-1  | 1  | 18 | 16 | 34 |
|           | 2  | 20 | 16 | 36 |
|           | 3  | 19 | 16 | 35 |
|           | 4  | 19 | 15 | 34 |
|           | 5  | 19 | 14 | 33 |
|           | 6  | 19 | 16 | 35 |
|           | 7  | 15 | 16 | 31 |
|           | 8  | 17 | 14 | 31 |
|           | 9  | 18 | 14 | 32 |
| <hr/>     |    |    |    |    |
| 12-19-1-1 | 1  | 18 | 18 | 36 |
|           | 2  | 15 | 14 | 29 |
|           | 3  | 18 | 14 | 32 |
|           | 4  | 20 | 16 | 36 |
|           | 5  | 20 | 12 | 32 |
|           | 6  | 19 | 14 | 33 |
|           | 7  | 18 | 16 | 34 |
|           | 8  | 17 | 16 | 33 |
|           | 9  | 20 | 14 | 34 |
|           | 10 | 17 | 14 | 31 |
|           | 11 | 18 | 16 | 34 |
|           | 12 | 18 | 13 | 31 |
|           | 13 | 18 | 15 | 33 |
|           | 14 | 18 | 14 | 32 |
|           | 15 | 19 | 14 | 33 |
|           | 16 | 20 | 16 | 36 |
|           | 17 | 18 | 16 | 34 |
|           | 18 | 14 | 13 | 27 |

|           |    |    |    |    |
|-----------|----|----|----|----|
|           | 19 | 14 | 14 | 28 |
|           | 20 | 19 | 15 | 34 |
|           | 21 | 18 | 14 | 32 |
|           | 22 | 19 | 11 | 30 |
|           | 23 | 20 | 16 | 36 |
|           | 24 | 20 | 16 | 36 |
|           | 25 | 15 | 13 | 28 |
|           | 26 | 20 | 16 | 36 |
|           | 27 | 17 | 15 | 32 |
|           | 28 | 15 | 14 | 29 |
|           | 29 | 21 | 16 | 37 |
|           | 30 | 19 | 15 | 34 |
|           | 31 | 18 | 12 | 30 |
|           | 32 | 20 | 17 | 37 |
|           | 33 | 19 | 16 | 35 |
| <hr/>     |    |    |    |    |
| 12-19-1-2 | 1  | 20 | 16 | 36 |
|           | 2  | 20 | 18 | 38 |
|           | 3  | 17 | 14 | 31 |
|           | 4  | 20 | 15 | 35 |
|           | 5  | 18 | 16 | 34 |
|           | 6  | 16 | 16 | 32 |
|           | 7  | 19 | 16 | 35 |
|           | 8  | 17 | 16 | 33 |
|           | 9  | 17 | 16 | 33 |
|           | 10 | 16 | 15 | 31 |
|           | 11 | 17 | 15 | 32 |
|           | 12 | 16 | 16 | 32 |
|           | 13 | 15 | 12 | 27 |
|           | 14 | 18 | 16 | 34 |
|           | 15 | 17 | 16 | 33 |
|           | 16 | 16 | 15 | 31 |
|           | 17 | 18 | 15 | 33 |
|           | 18 | 20 | 13 | 33 |
|           | 19 | 20 | 15 | 35 |
|           | 20 | 16 | 16 | 32 |
|           | 21 | 20 | 16 | 36 |
|           | 22 | 20 | 16 | 36 |
|           | 23 | 17 | 16 | 33 |
|           | 24 | 16 | 16 | 32 |

|           |    |    |    |    |
|-----------|----|----|----|----|
|           | 25 | 18 | 16 | 34 |
|           | 26 | 17 | 16 | 33 |
|           | 27 | 18 | 16 | 34 |
| <hr/>     |    |    |    |    |
| 12-19-1-4 | 1  | 19 | 16 | 35 |
|           | 2  | 19 | 16 | 35 |
|           | 3  | 19 | 16 | 35 |
|           | 4  | 19 | 16 | 35 |
|           | 5  | 19 | 16 | 35 |
|           | 6  | 19 | 15 | 34 |
|           | 7  | 19 | 16 | 35 |
|           | 8  | 20 | 16 | 36 |
|           | 9  | 18 | 16 | 34 |
|           | 10 | 17 | 15 | 32 |
|           | 11 | 19 | 16 | 35 |
|           | 12 | 19 | 16 | 35 |
|           | 13 | 19 | 16 | 35 |
|           | 14 | 19 | 16 | 35 |
|           | 15 | 19 | 16 | 35 |
| <hr/>     |    |    |    |    |
| 12-19-1-5 | 1  | 19 | 14 | 33 |
|           | 2  | 19 | 16 | 35 |
|           | 3  | 19 | 15 | 34 |
|           | 4  | 19 | 13 | 32 |
|           | 5  | 19 | 15 | 34 |
|           | 6  | 19 | 15 | 34 |
|           | 7  | 19 | 15 | 34 |
|           | 8  | 19 | 15 | 34 |
|           | 9  | 19 | 15 | 34 |
|           | 10 | 19 | 15 | 34 |
|           | 11 | 19 | 15 | 34 |
| <hr/>     |    |    |    |    |
| 12-19-9-1 | 1  | 21 | 16 | 37 |
|           | 2  | 20 | 16 | 36 |
|           | 3  | 20 | 15 | 35 |
|           | 4  | 20 | 16 | 36 |
|           | 5  | 20 | 16 | 36 |
|           | 6  | 20 | 16 | 36 |
|           | 7  | 20 | 16 | 36 |
| <hr/>     |    |    |    |    |
| 14-3-3-1  | 1  | 16 | 15 | 31 |
|           | 2  | 17 | 14 | 31 |
|           | 3  | 16 | 14 | 30 |



|          |    |    |    |    |
|----------|----|----|----|----|
|          | 4  | 16 | 12 | 28 |
|          | 5  | 18 | 15 | 33 |
|          | 6  | 19 | 15 | 34 |
|          | 7  | 16 | 17 | 33 |
|          | 8  | 18 | 16 | 34 |
|          | 9  | 18 | 14 | 32 |
|          | 10 | 11 | 9  | 20 |
|          | 11 | 16 | 12 | 28 |
|          | 12 | 16 | 14 | 30 |
|          | 13 | 15 | 12 | 27 |
|          | 14 | 19 | 16 | 35 |
|          | 15 | 17 | 15 | 32 |
|          | 16 | 17 | 14 | 31 |
|          | 17 | 20 | 13 | 33 |
| 14-4-4-1 | 1  | 14 | 10 | 24 |
|          | 2  | 15 | 13 | 28 |
|          | 3  | 14 | 13 | 27 |
|          | 4  | 15 | 15 | 30 |
|          | 5  | 15 | 14 | 29 |
|          | 6  | 14 | 12 | 26 |
|          | 7  | 14 | 14 | 28 |
|          | 8  | 15 | 11 | 26 |
|          | 9  | 11 | 9  | 20 |
|          | 10 | 16 | 15 | 31 |
|          | 11 | 12 | 7  | 19 |
|          | 12 | 15 | 10 | 25 |
|          | 13 | 15 | 13 | 28 |
|          | 14 | 12 | 14 | 26 |
|          | 15 | 15 | 14 | 29 |
|          | 16 | 11 | 6  | 17 |
|          | 17 | 16 | 15 | 31 |
|          | 18 | 14 | 14 | 28 |
|          | 19 | 16 | 15 | 31 |
|          | 20 | 17 | 15 | 32 |
|          | 21 | 16 | 15 | 31 |
|          | 22 | 16 | 15 | 31 |
|          | 23 | 16 | 15 | 31 |
|          | 24 | 16 | 14 | 30 |
|          | 25 | 16 | 16 | 32 |

|          |    |    |    |    |
|----------|----|----|----|----|
| 19-1-9-1 | 1  | 10 | 8  | 18 |
|          | 2  | 13 | 12 | 25 |
|          | 3  | 17 | 15 | 32 |
|          | 4  | 19 | 17 | 36 |
|          | 5  | 14 | 13 | 27 |
|          | 6  | 15 | 10 | 25 |
|          | 7  | 10 | 8  | 18 |
|          | 8  | 10 | 9  | 19 |
|          | 9  | 11 | 7  | 18 |
|          | 10 | 9  | 6  | 15 |
|          | 11 | 12 | 11 | 23 |
|          | 12 | 11 | 10 | 21 |
|          | 13 | 10 | 12 | 22 |
|          | 14 | 9  | 8  | 17 |
|          | 15 | 18 | 16 | 34 |
|          | 16 | 15 | 12 | 27 |
|          | 17 | 16 | 15 | 31 |
|          | 18 | 14 | 14 | 28 |
|          | 19 | 13 | 13 | 26 |
|          | 20 | 14 | 17 | 31 |
|          | 21 | 13 | 13 | 26 |
|          | 22 | 17 | 12 | 29 |
|          | 23 | 12 | 12 | 24 |
|          | 24 | 13 | 14 | 27 |
|          | 25 | 16 | 16 | 32 |
|          | 26 | 14 | 12 | 26 |
|          | 27 | 16 | 14 | 30 |
|          | 28 | 15 | 16 | 31 |
|          | 29 | 15 | 13 | 28 |
|          | 30 | 16 | 14 | 30 |
|          | 31 | 16 | 14 | 30 |
|          | 32 | 16 | 15 | 31 |
|          | 33 | 15 | 14 | 29 |
|          | 34 | 15 | 15 | 30 |
|          | 35 | 16 | 16 | 32 |
| 19-1-9-2 | 1  | 14 | 12 | 26 |
|          | 2  | 14 | 12 | 26 |
|          | 3  | 13 | 11 | 24 |
|          | 4  | 14 | 12 | 26 |

|          |    |    |    |    |
|----------|----|----|----|----|
|          | 5  | 16 | 16 | 32 |
|          | 6  | 16 | 12 | 28 |
|          | 7  | 18 | 16 | 34 |
|          | 8  | 15 | 14 | 29 |
|          | 9  | 11 | 12 | 23 |
| <hr/>    |    |    |    |    |
| 19-1-9-3 | 1  | 16 | 15 | 31 |
|          | 2  | 17 | 16 | 33 |
|          | 3  | 16 | 15 | 31 |
|          | 4  | 14 | 13 | 27 |
|          | 5  | 16 | 15 | 31 |
|          | 6  | 18 | 16 | 34 |
|          | 7  | 16 | 15 | 31 |
|          | 8  | 16 | 15 | 31 |
|          | 9  | 16 | 16 | 32 |
|          | 10 | 15 | 15 | 30 |
|          | 11 | 15 | 15 | 30 |
|          | 12 | 16 | 17 | 33 |
|          | 13 | 15 | 13 | 28 |
|          | 14 | 17 | 16 | 33 |
|          | 15 | 16 | 14 | 30 |
|          | 16 | 16 | 14 | 30 |
|          | 17 | 18 | 16 | 34 |
|          | 18 | 16 | 13 | 29 |
|          | 19 | 17 | 14 | 31 |
|          | 20 | 16 | 13 | 29 |
|          | 21 | 16 | 15 | 31 |
|          | 22 | 12 | 14 | 26 |
|          | 23 | 16 | 13 | 29 |
|          | 24 | 12 | 14 | 26 |
|          | 25 | 16 | 14 | 30 |
|          | 26 | 16 | 16 | 32 |
| <hr/>    |    |    |    |    |
| 19-1-9-4 | 1  | 19 | 16 | 35 |
|          | 2  | 20 | 15 | 35 |
|          | 3  | 20 | 16 | 36 |
|          | 4  | 20 | 16 | 36 |
|          | 5  | 19 | 16 | 35 |
|          | 6  | 20 | 16 | 36 |
|          | 7  | 16 | 15 | 31 |
|          | 8  | 16 | 16 | 32 |

|          |    |    |    |    |
|----------|----|----|----|----|
|          | 9  | 18 | 12 | 30 |
|          | 10 | 16 | 9  | 25 |
|          | 11 | 18 | 16 | 34 |
|          | 12 | 16 | 14 | 30 |
|          | 13 | 14 | 8  | 22 |
|          | 14 | 16 | 14 | 30 |
|          | 15 | 15 | 12 | 27 |
|          | 16 | 16 | 14 | 30 |
|          | 17 | 16 | 12 | 28 |
|          | 18 | 16 | 14 | 30 |
|          | 19 | 19 | 16 | 35 |
|          | 20 | 19 | 16 | 35 |
|          | 21 | 18 | 14 | 32 |
|          | 22 | 15 | 13 | 28 |
|          | 23 | 18 | 16 | 34 |
|          | 24 | 20 | 16 | 36 |
|          | 25 | 14 | 12 | 26 |
|          | 26 | 20 | 16 | 36 |
|          | 27 | 17 | 15 | 32 |
|          | 28 | 14 | 10 | 24 |
| 19-1-9-5 | 1  | 16 | 12 | 28 |
|          | 2  | 16 | 12 | 28 |
|          | 3  | 18 | 14 | 32 |
|          | 4  | 13 | 15 | 28 |
|          | 5  | 16 | 14 | 30 |
|          | 6  | 15 | 11 | 26 |
|          | 7  | 16 | 16 | 32 |
|          | 8  | 12 | 13 | 25 |
|          | 9  | 16 | 16 | 32 |
|          | 10 | 16 | 16 | 32 |
|          | 11 | 16 | 16 | 32 |
|          | 12 | 16 | 16 | 32 |
|          | 13 | 17 | 15 | 32 |
|          | 14 | 18 | 16 | 34 |
|          | 15 | 16 | 15 | 31 |
|          | 16 | 18 | 14 | 32 |
|          | 17 | 18 | 12 | 30 |
|          | 18 | 16 | 15 | 31 |
|          | 19 | 18 | 14 | 32 |

|          |    |    |    |    |
|----------|----|----|----|----|
|          | 20 | 16 | 15 | 31 |
| 19-1-9-6 | 1  | 13 | 14 | 27 |
|          | 2  | 15 | 13 | 28 |
|          | 3  | 14 | 11 | 25 |
|          | 4  | 19 | 15 | 34 |
|          | 5  | 16 | 13 | 29 |
|          | 6  | 15 | 12 | 27 |
|          | 7  | 17 | 15 | 32 |
|          | 8  | 13 | 16 | 29 |
|          | 9  | 13 | 12 | 25 |
|          | 10 | 18 | 15 | 33 |
|          | 11 | 16 | 14 | 30 |
|          | 12 | 16 | 13 | 29 |
|          | 13 | 16 | 13 | 29 |
|          | 14 | 14 | 12 | 26 |
|          | 15 | 16 | 17 | 33 |
|          | 16 | 16 | 15 | 31 |
|          | 17 | 16 | 16 | 32 |
|          | 18 | 16 | 12 | 28 |
|          | 19 | 16 | 14 | 30 |
|          | 20 | 16 | 12 | 28 |
| 19-1-9-7 | 1  | 19 | 15 | 34 |
|          | 2  | 15 | 9  | 24 |
|          | 3  | 18 | 15 | 33 |
|          | 4  | 20 | 14 | 34 |
|          | 5  | 16 | 12 | 28 |
|          | 6  | 20 | 15 | 35 |
|          | 7  | 18 | 14 | 32 |
|          | 8  | 16 | 16 | 32 |
|          | 9  | 15 | 12 | 27 |
|          | 10 | 18 | 15 | 33 |
|          | 11 | 20 | 13 | 33 |
|          | 12 | 18 | 15 | 33 |
|          | 13 | 19 | 14 | 33 |
|          | 14 | 18 | 14 | 32 |
|          | 15 | 19 | 17 | 36 |
|          | 16 | 20 | 14 | 34 |
|          | 17 | 18 | 15 | 33 |
| 19-1-9-9 | 1  | 17 | 16 | 33 |

|           |    |    |    |    |
|-----------|----|----|----|----|
|           | 2  | 17 | 16 | 33 |
|           | 3  | 16 | 11 | 27 |
|           | 4  | 17 | 11 | 28 |
|           | 5  | 10 | 5  | 15 |
|           | 6  | 8  | 9  | 17 |
|           | 7  | 17 | 10 | 27 |
|           | 8  | 18 | 15 | 33 |
|           | 9  | 20 | 14 | 34 |
|           | 10 | 19 | 14 | 33 |
|           | 11 | 19 | 13 | 32 |
|           | 12 | 17 | 16 | 33 |
|           | 13 | 14 | 15 | 29 |
|           | 14 | 17 | 16 | 33 |
|           | 15 | 19 | 16 | 35 |
| 19-1-10-1 | 1  | 20 | 16 | 36 |
|           | 2  | 20 | 16 | 36 |
|           | 3  | 20 | 16 | 36 |
|           | 4  | 22 | 16 | 38 |
|           | 5  | 21 | 17 | 38 |
|           | 6  | 18 | 11 | 29 |
|           | 7  | 20 | 15 | 35 |
|           | 8  | 20 | 16 | 36 |
|           | 9  | 20 | 15 | 35 |
|           | 10 | 20 | 16 | 36 |
|           | 11 | 18 | 16 | 34 |
|           | 12 | 20 | 15 | 35 |
|           | 13 | 18 | 15 | 33 |
|           | 14 | 18 | 16 | 34 |
|           | 15 | 20 | 16 | 36 |
|           | 16 | 18 | 16 | 34 |
|           | 17 | 20 | 16 | 36 |
|           | 18 | 21 | 12 | 33 |
|           | 19 | 17 | 14 | 31 |
|           | 20 | 20 | 13 | 33 |
|           | 21 | 22 | 15 | 37 |
|           | 22 | 22 | 16 | 38 |
|           | 23 | 20 | 16 | 36 |
|           | 24 | 20 | 16 | 36 |
|           | 25 | 20 | 16 | 36 |

|           |    |    |    |    |
|-----------|----|----|----|----|
| 26        | 22 | 16 | 38 |    |
| 27        | 21 | 13 | 34 |    |
| 28        | 20 | 16 | 36 |    |
| 29        | 20 | 16 | 36 |    |
| 30        | 20 | 14 | 34 |    |
| 31        | 20 | 14 | 34 |    |
| 32        | 21 | 16 | 37 |    |
| 33        | 21 | 16 | 37 |    |
| 34        | 23 | 16 | 39 |    |
| 35        | 21 | 15 | 36 |    |
| 36        | 21 | 17 | 38 |    |
| 37        | 23 | 16 | 39 |    |
| 38        | 21 | 15 | 36 |    |
| 39        | 22 | 16 | 38 |    |
| 40        | 22 | 16 | 38 |    |
| <hr/>     |    |    |    |    |
| 19-1-10-2 | 1  | 20 | 16 | 36 |
|           | 2  | 19 | 13 | 32 |
|           | 3  | 19 | 15 | 34 |
|           | 4  | 20 | 14 | 34 |
|           | 5  | 19 | 16 | 35 |
|           | 6  | 18 | 16 | 34 |
|           | 7  | 18 | 13 | 31 |
|           | 8  | 20 | 16 | 36 |
|           | 9  | 20 | 16 | 36 |
|           | 10 | 20 | 16 | 36 |
|           | 11 | 17 | 15 | 32 |
|           | 12 | 18 | 12 | 30 |
|           | 13 | 19 | 16 | 35 |
|           | 14 | 19 | 11 | 30 |
|           | 15 | 20 | 16 | 36 |
|           | 16 | 19 | 14 | 33 |
| <hr/>     |    |    |    |    |
