# Supplementary material
Source: PubMed Central journal article supplement (PMC3374316)
Supplement: supp_112.139295_FigureS1.pdf [file supp_112.139295_FigureS1.pdf]

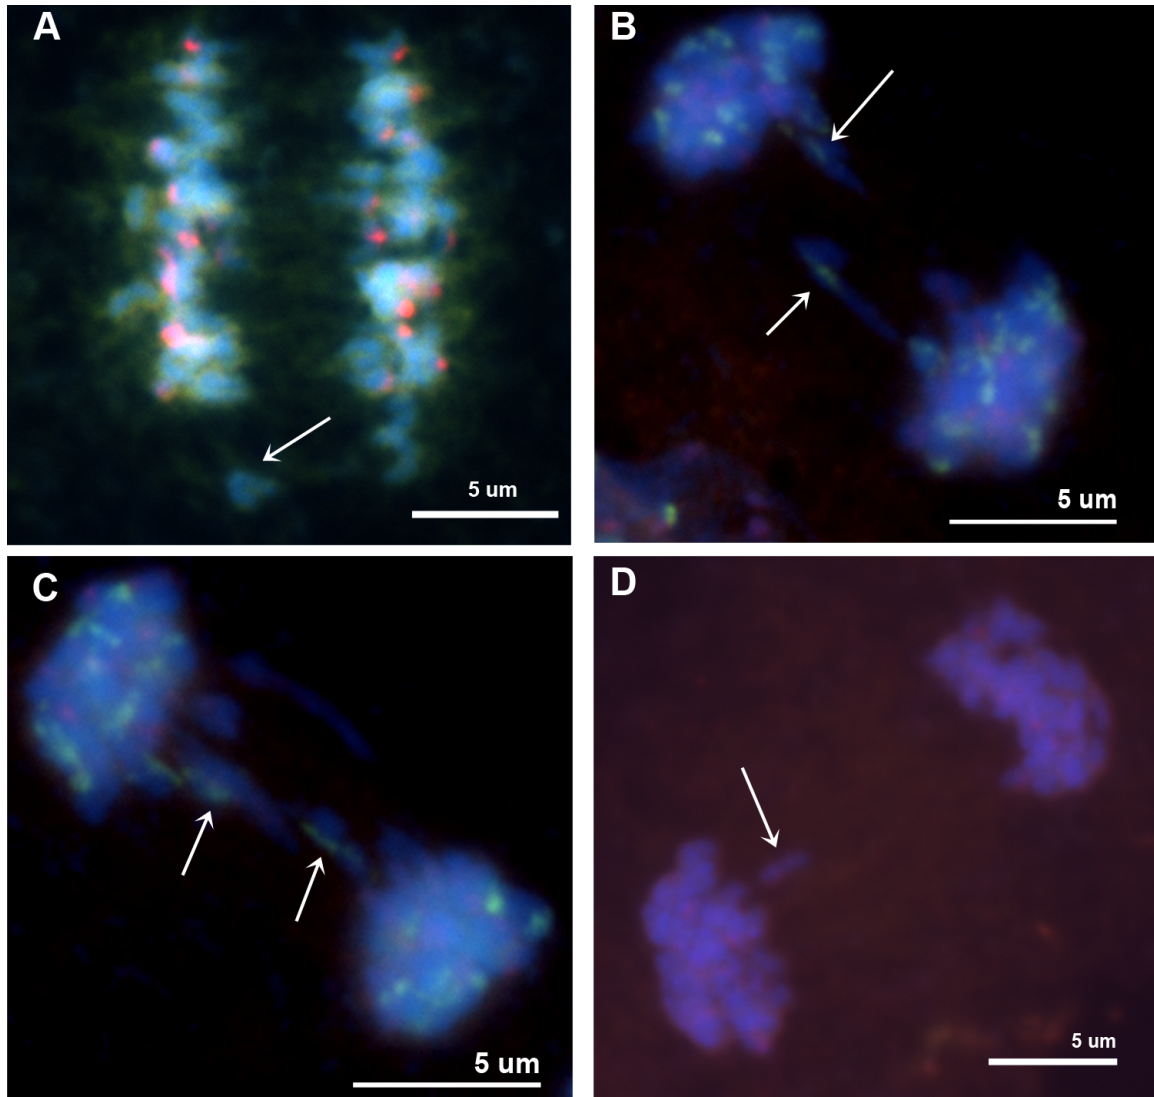

**Figure S1** Laggards and bridges in meiotic (A) and mitotic (B-D) cells of allohexaploids. Cells were prepared for FISH as described in the methods and centromeres labeled with fluorescein (green, *At*) or Texas Red (red, *Aa*). Arrows point to bridges or laggards between dividing cells. A: F9 12-3-5-2, B: F8 2-8-5-3, C: F8 2-8-5-3, D: F8 2-8-5-3.
