# Supplementary material
Source: PubMed Central journal article supplement (PMC3374316)
Supplement: supp_112.139295_FigureS4.pdf [file supp_112.139295_FigureS4.pdf]

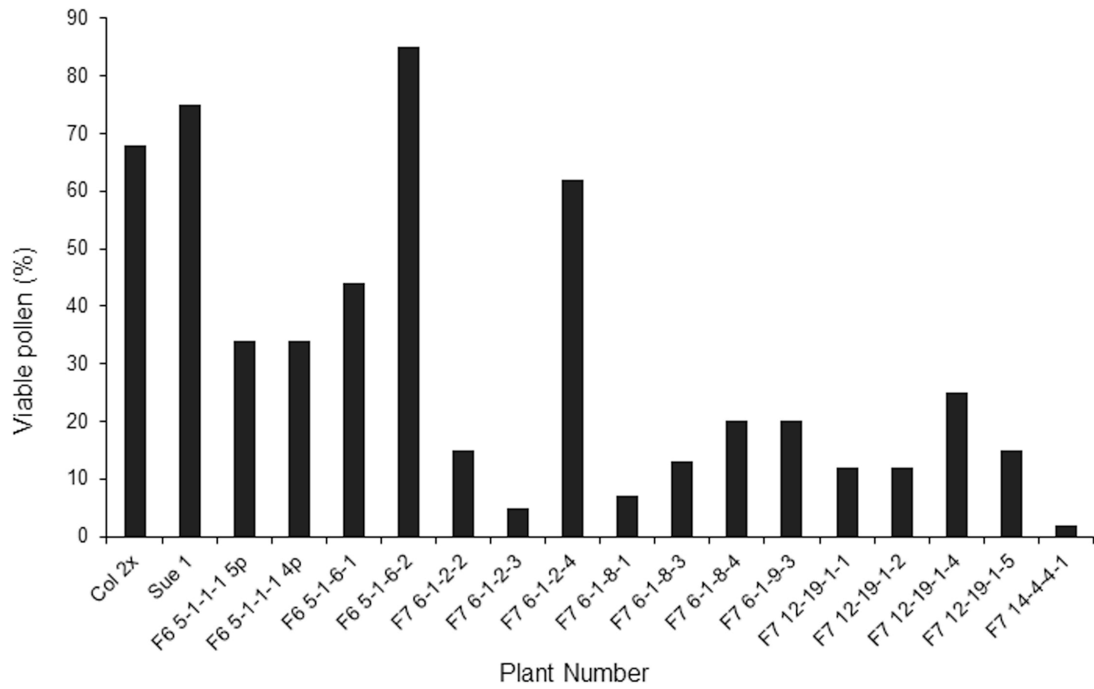

**Figure S4** Pollen viability in allohexaploids and progenitors. Live/dead staining of pollen was performed using acetocarmine. The average percent viability for the parent species was  $71 \pm 2.5\%$ , (SE, N=2) while the overall average for allohexaploids was  $25 \pm 5.6\%$  (SE, N=16), which was statistically significantly different ( $p=0.012$ ,  $t=2.84$ ,  $df=16$ ).
