# Supplementary material
Source: PubMed Central journal article supplement (PMC3374316)
Supplement: supp_112.139295_FigureS5.pdf [file supp_112.139295_FigureS5.pdf]

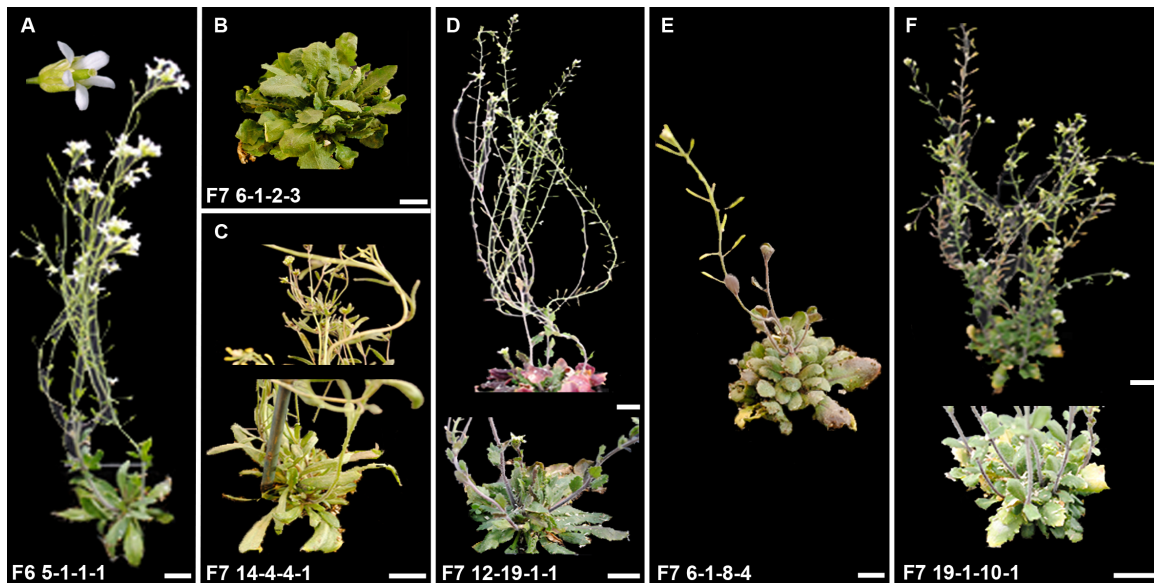

**Figure S5** Phenotypic variation in F6 and F7 allohexaploids. A) F6 5-1-1-1 individual with 5 petals. B) Rosette of F7 6-1-2-3. C) F7 14-4-4-1. D) F7 12-19-1-1 with close-up of rosette. E) F7 6-1-8-4. F) 19-1-10-1 with close-up of rosette. Size bar = 2cm.
