# Supplementary material
Source: PubMed Central journal article supplement (PMC3374316)
Supplement: supp_112.139295_TableS1.pdf [file supp_112.139295_TableS1.pdf]

**Table S1 Frequency of Aneuploidy in Allohexaploids over 3 Generations Based on Expected Chromosome Numbers\*.**

| Generation | Plant Number   | Cells analyzed | Aneuploid cells (%) | Cells with                        | Cells with                        | At                           | Aa                           | At                        | Aa                        |
|------------|----------------|----------------|---------------------|-----------------------------------|-----------------------------------|------------------------------|------------------------------|---------------------------|---------------------------|
|            |                |                |                     | expected At chromosome number (%) | expected Aa chromosome number (%) | hyperploid** chromosomes (%) | hyperploid** chromosomes (%) | hypoploid chromosomes (%) | hypoploid chromosomes (%) |
| F3         | 2-1            | 10             | 100                 | 0                                 | 30                                | 20                           | 20                           | 80                        | 50                        |
|            | 2-5            | 10             | 90                  | 20                                | 40                                | 0                            | 10                           | 80                        | 50                        |
|            | 2-8            | 11             | 100                 | 0                                 | 27                                | 0                            | 27                           | 100                       | 45                        |
|            | 5-1            | 10             | 90                  | 10                                | 30                                | 0                            | 0                            | 90                        | 70                        |
|            | 5-2            | 10             | 90                  | 10                                | 40                                | 10                           | 0                            | 80                        | 60                        |
|            | 5-3            | 14             | 100                 | 0                                 | 93                                | 0                            | 0                            | 100                       | 7                         |
|            | 6-1            | 11             | 91                  | 18                                | 45                                | 9                            | 18                           | 73                        | 36                        |
|            | 6-5            | 11             | 100                 | 0                                 | 64                                | 0                            | 9                            | 100                       | 27                        |
|            | 6-10           | 11             | 91                  | 27                                | 9                                 | 0                            | 27                           | 73                        | 64                        |
|            | 12-3           | 12             | 92                  | 25                                | 30                                | 0                            | 17                           | 75                        | 50                        |
|            | 12-11          | 10             | 90                  | 20                                | 50                                | 0                            | 10                           | 80                        | 40                        |
|            | 12-19          | 11             | 91                  | 9                                 | 55                                | 0                            | 0                            | 91                        | 45                        |
|            | 14-2           | 10             | 100                 | 0                                 | 10                                | 0                            | 10                           | 100                       | 80                        |
|            | 14-4           | 10             | 100                 | 30                                | 40                                | 10                           | 30                           | 60                        | 30                        |
|            | 14-9           | 21             | 95                  | 10                                | 24                                | 5                            | 0                            | 86                        | 76                        |
|            | 19-1           | 10             | 100                 | 0                                 | 30                                | 0                            | 0                            | 100                       | 70                        |
|            | 19-3           | 11             | 100                 | 0                                 | 18                                | 0                            | 0                            | 100                       | 82                        |
|            | 19-5           | 11             | 100                 | 18                                | 18                                | 18                           | 9                            | 64                        | 73                        |
|            | <b>Average</b> |                |                     | <b>96</b>                         | <b>11</b>                         | <b>36</b>                    | <b>4</b>                     | <b>10</b>                 | <b>85</b>                 |

| Generation | Plant Number   | Cells analyzed | Aneuploid cells (%) | Cells with expected At chromosome number (%) | Cells with expected Aa chromosome number (%) | At hyperploid** chromosomes (%) | Aa hyperploid** chromosomes (%) | At hypoploid chromosomes (%) | Aa hypoploid chromosomes (%) |           |
|------------|----------------|----------------|---------------------|----------------------------------------------|----------------------------------------------|---------------------------------|---------------------------------|------------------------------|------------------------------|-----------|
| F6         | 2-8-3          | 1              | 100                 | 0                                            | 100                                          | 0                               | 0                               | 100                          | 100                          |           |
|            | 2-8-5          | 9              | 44                  | 78                                           | 78                                           | 0                               | 0                               | 33                           | 22                           |           |
|            | 5-1-1-1<br>5   | 25             | 96                  | 25                                           | 72                                           | 0                               | 0                               | 96                           | 68                           |           |
|            | 5-1-1-1<br>4   | 25             | 100                 | 25                                           | 88                                           | 0                               | 0                               | 96                           | 12                           |           |
|            | 5-1-6-1        | 26             | 100                 | 26                                           | 35                                           | 0                               | 0                               | 65                           | 58                           |           |
|            | 5-1-6-2        | 6              | 100                 | 6                                            | 33                                           | 0                               | 0                               | 100                          | 50                           |           |
|            | 5-1-6-4        | 13             | 100                 | 13                                           | 77                                           | 0                               | 8                               | 100                          | 15                           |           |
|            | 6-1-2          | 8              | 50                  | 63                                           | 75                                           | 13                              | 13                              | 25                           | 13                           |           |
|            | 6-1-6          | 7              | 71                  | 29                                           | 71                                           | 0                               | 0                               | 71                           | 43                           |           |
|            | 6-1-8          | 7              | 100                 | 0                                            | 86                                           | 100                             | 0                               | 0                            | 14                           |           |
|            | 6-1-9          | 4              | 50                  | 50                                           | 100                                          | 50                              | 0                               | 0                            | 0                            |           |
|            | 12-19-1        | 10             | 100                 | 0                                            | 100                                          | 0                               | 0                               | 20                           | 0                            |           |
|            | 12-19-9        | 1              | 0                   | 100                                          | 100                                          | 0                               | 0                               | 0                            | 0                            |           |
|            | 14-4-3         | 2              | 100                 | 0                                            | 100                                          | 0                               | 0                               | 100                          | 0                            |           |
|            | 14-4-4         | 7              | 100                 | 0                                            | 0                                            | 0                               | 0                               | 100                          | 100                          |           |
|            | 19-1-4         | 7              | 14                  | 86                                           | 100                                          | 0                               | 0                               | 14                           | 0                            |           |
|            | 19-1-9         | 6              | 100                 | 0                                            | 100                                          | 0                               | 0                               | 100                          | 0                            |           |
|            | 19-1-10        | 7              | 86                  | 14                                           | 100                                          | 71                              | 0                               | 14                           | 0                            |           |
|            | <b>Average</b> |                |                     | <b>78</b>                                    | <b>29</b>                                    | <b>79</b>                       | <b>13</b>                       | <b>1</b>                     | <b>58</b>                    | <b>27</b> |

| Generation | Plant Number | Cells analyzed | Aneuploid cells (%) | Cells with expected At chromosome number (%) | Cells with expected Aa chromosome number (%) | At hyperploid** chromosomes (%) | Aa hyperploid** chromosomes (%) | At hypoploid chromosomes (%) | Aa hypoploid chromosomes (%) |
|------------|--------------|----------------|---------------------|----------------------------------------------|----------------------------------------------|---------------------------------|---------------------------------|------------------------------|------------------------------|
| F7         | 6-1-2-1      | 7              | 100                 | 7                                            | 14                                           | 0                               | 86                              | 100                          | 0                            |
|            | 6-1-2-2      | 24             | 100                 | 13                                           | 4                                            | 88                              | 0                               | 0                            | 96                           |
|            | 6-1-2-3      | 26             | 100                 | 0                                            | 81                                           | 100                             | 8                               | 0                            | 12                           |
|            | 6-1-2-4      | 6              | 50                  | 50                                           | 83                                           | 0                               | 0                               | 50                           | 17                           |
|            | 6-1-6-2      | 11             | 18                  | 82                                           | 100                                          | 0                               | 0                               | 18                           | 0                            |
|            | 6-1-6-4      | 4              | 100                 | 0                                            | 75                                           | 75                              | 0                               | 25                           | 25                           |
|            | 6-1-8-1      | 38             | 89                  | 38                                           | 50                                           | 3                               | 0                               | 74                           | 50                           |
|            | 6-1-8-2      | 9              | 100                 | 11                                           | 11                                           | 11                              | 11                              | 78                           | 78                           |
|            | 6-1-8-3      | 13             | 92                  | 15                                           | 46                                           | 62                              | 0                               | 23                           | 54                           |
|            | 6-1-8-4      | 28             | 93                  | 7                                            | 68                                           | 71                              | 0                               | 18                           | 32                           |
|            | 6-1-9-1      | 28             | 96                  | 7                                            | 18                                           | 0                               | 0                               | 93                           | 89                           |
|            | 6-1-9-3      | 13             | 92                  | 31                                           | 38                                           | 15                              | 8                               | 54                           | 54                           |
|            | 6-1-9-4      | 11             | 100                 | 0                                            | 55                                           | 0                               | 0                               | 100                          | 73                           |
|            | 12-1-9-4     | 38             | 95                  | 8                                            | 16                                           | 0                               | 0                               | 92                           | 84                           |
|            | 12-3-5-1     | 9              | 89                  | 9                                            | 45                                           | 0                               | 0                               | 89                           | 44                           |
|            | 12-19-1-1    | 33             | 82                  | 24                                           | 33                                           | 3                               | 6                               | 73                           | 61                           |

| Generation | Plant Number   | Cells analyzed | Aneuploid cells (%) | Cells with expected At chromosome number (%) | Cells with expected Aa chromosome number (%) | Cells with At hyperploid** chromosomes (%) | Cells with Aa hyperploid** chromosomes (%) | Cells with At hypoploid chromosomes (%) | Cells with Aa hypoploid chromosomes (%) |
|------------|----------------|----------------|---------------------|----------------------------------------------|----------------------------------------------|--------------------------------------------|--------------------------------------------|-----------------------------------------|-----------------------------------------|
| F7         | 12-19-1-2      | 27             | 89                  | 26                                           | 63                                           | 0                                          | 4                                          | 74                                      | 33                                      |
|            | 12-19-1-4      | 15             | 93                  | 7                                            | 87                                           | 0                                          | 0                                          | 93                                      | 87                                      |
|            | 12-19-1-5      | 11             | 100                 | 0                                            | 9                                            | 0                                          | 0                                          | 100                                     | 91                                      |
|            | 12-19-9-1      | 7              | 29                  | 86                                           | 86                                           | 14                                         | 0                                          | 0                                       | 14                                      |
|            | 14-3-3-1       | 17             | 100                 | 17                                           | 12                                           | 0                                          | 6                                          | 94                                      | 82                                      |
|            | 14-4-4-1       | 25             | 100                 | 25                                           | 4                                            | 0                                          | 0                                          | 100                                     | 96                                      |
|            | 19-1-9-1       | 35             | 100                 | 35                                           | 11                                           | 0                                          | 6                                          | 100                                     | 83                                      |
|            | 19-1-9-2       | 9              | 100                 | 9                                            | 22                                           | 0                                          | 0                                          | 100                                     | 78                                      |
|            | 19-1-9-3       | 26             | 100                 | 27                                           | 22                                           | 0                                          | 4                                          | 96                                      | 70                                      |
|            | 19-1-9-4       | 28             | 82                  | 18                                           | 43                                           | 0                                          | 0                                          | 79                                      | 57                                      |
|            | 19-1-9-5       | 20             | 100                 | 20                                           | 30                                           | 0                                          | 0                                          | 100                                     | 70                                      |
|            | 19-1-9-6       | 20             | 100                 | 20                                           | 10                                           | 0                                          | 5                                          | 100                                     | 85                                      |
|            | 19-1-9-7       | 17             | 100                 | 17                                           | 6                                            | 0                                          | 6                                          | 76                                      | 88                                      |
|            | 19-1-9-9       | 15             | 100                 | 15                                           | 33                                           | 0                                          | 0                                          | 93                                      | 67                                      |
|            | 19-1-10-1      | 40             | 70                  | 40                                           | 60                                           | 40                                         | 5                                          | 15                                      | 35                                      |
|            | 19-1-10-2      | 16             | 62                  | 16                                           | 50                                           | 0                                          | 0                                          | 63                                      | 50                                      |
|            | <b>Average</b> |                |                     | <b>89</b>                                    | <b>24</b>                                    | <b>34</b>                                  | <b>3</b>                                   | <b>2</b>                                | <b>80</b>                               |

\* Expected chromosome number is: At - 20; Aa - 16

\*\* Hyperploid chromosomes are those that exceed the expected number and hypoploid chromosomes are those that are fewer than the expected number
