# Supplementary material
Source: PubMed Central journal article supplement (PMC3374316)
Supplement: supp_112.139295_TableS2.pdf [file supp_112.139295_TableS2.pdf]

Table S2 Frequency of Aneuploidy in Allohexaploids over 3 Generations Based on Modal Chromosome Numbers.

| Generation | Plant number  | Cells analyzed | Modal chromosome |    | Aneuploid (%) |
|------------|---------------|----------------|------------------|----|---------------|
|            |               |                | numbers*         |    |               |
|            |               |                | At               | Aa |               |
| F3         | 2-1           | 10             | 18               | 16 | 90            |
|            | 2-5           | 10             | 18               | 16 | 90            |
|            | 2-8           | 11             | 19               | 16 | 91            |
|            | 5-1           | 10             | 17               | 16 | 100           |
|            | 5-2           | 10             | 17               | 14 | 80            |
|            | 5-3           | 14             | 19               | 16 | 64            |
|            | 6-1           | 11             | 19               | 16 | 73            |
|            | 6-5           | 11             | 16               | 16 | 73            |
|            | 6-10          | 11             | 16               | 13 | 91            |
|            | 12-3          | 12             | 17               | 16 | 75            |
|            | 12-11         | 10             | 19               | 16 | 70            |
|            | 12-19         | 11             | 19               | 16 | 64            |
|            | 14-2          | 10             | 16               | 15 | 80            |
|            | 14-4          | 10             | 20               | 16 | 100           |
|            | 14-9          | 21             | 17               | 15 | 86            |
|            | 19-1          | 10             | 19               | 15 | 80            |
|            | 19-3          | 11             | 19               | 14 | 91            |
|            | 19-5          | 11             | 19               | 16 | 82            |
|            |               | <b>Average</b> |                  |    |               |
| F6         | 2-8-3         | 1              | 19               | 16 | 0             |
|            | 2-8-5         | 9              | 20               | 16 | 56            |
|            | 5-1-1-1 5p ** | 26             | 17               | 16 | 36            |
|            | 5-1-1-1 4p**  | 25             | 17               | 16 | 16            |
|            | 5-1-6-1       | 26             | 16               | 16 | 77            |
|            | 5-1-6-2       | 6              | 13               | 14 | 100           |
|            | 5-1-6-4       | 13             | 15               | 16 | 31            |
|            | 6-1-2         | 8              | 20               | 16 | 50            |
|            | 6-1-6         | 7              | 20               | 16 | 100           |
|            | 6-1-8         | 8              | 23               | 16 | 38            |
|            | 6-1-9         | 4              | 20               | 16 | 50            |
|            | 12-19-1       | 10             | 19               | 16 | 20            |
|            | 12-19-9       | 1              | 20               | 16 | 0             |

|                |   |    |    |           |
|----------------|---|----|----|-----------|
| <b>14-4-3</b>  | 2 | 18 | 16 | 0         |
| <b>14-4-4</b>  | 7 | 17 | 15 | 71        |
| <b>19-1-4</b>  | 7 | 20 | 16 | 43        |
| <b>19-1-9</b>  | 6 | 19 | 16 | 17        |
| <b>19-1-10</b> | 7 | 21 | 16 | 43        |
| <b>Average</b> |   |    |    | <b>41</b> |

| <b>Generation</b> | <b>Plant number</b> | <b>Cells analyzed</b> | <b>Modal chromosome numbers</b> |           | <b>Aneuploid (%)</b> |
|-------------------|---------------------|-----------------------|---------------------------------|-----------|----------------------|
|                   |                     |                       | <b>At</b>                       | <b>Aa</b> |                      |
| <b>F7</b>         | <b>6-1-2-1</b>      | 7                     | 18                              | 17        | 57                   |
|                   | <b>6-1-2-2</b>      | 24                    | 21                              | 15        | 29                   |
|                   | <b>6-1-2-3</b>      | 26                    | 21                              | 16        | 58                   |
|                   | <b>6-1-2-4</b>      | 6                     | 20                              | 16        | 50                   |
|                   | <b>6-1-6-2</b>      | 11                    | 20                              | 16        | 18                   |
|                   | <b>6-1-6-4</b>      | 4                     | 21                              | 16        | 50                   |
|                   | <b>6-1-8-1</b>      | 38                    | 16                              | 16        | 84                   |
|                   | <b>6-1-8-2</b>      | 9                     | 18                              | 11        | 89                   |
|                   | <b>6-1-8-3</b>      | 13                    | 21                              | 16        | 85                   |
|                   | <b>6-1-8-4</b>      | 28                    | 23                              | 16        | 46                   |
|                   | <b>6-1-9-1</b>      | 28                    | 18                              | 14        | 93                   |
|                   | <b>6-1-9-3</b>      | 13                    | 20                              | 16        | 92                   |
|                   | <b>6-1-9-4</b>      | 11                    | 19                              | 15        | 82                   |
|                   | <b>12-1-9-4</b>     | 38                    | 17                              | 14        | 95                   |
|                   | <b>12-3-5-1</b>     | 9                     | 19                              | 16        | 78                   |
|                   | <b>12-19-1-1</b>    | 33                    | 18                              | 16        | 91                   |
|                   | <b>12-19-1-2</b>    | 27                    | 17                              | 16        | 81                   |
|                   | <b>12-19-1-4</b>    | 15                    | 19                              | 16        | 27                   |
|                   | <b>12-19-1-5</b>    | 11                    | 19                              | 15        | 27                   |
|                   | <b>12-19-9-1</b>    | 7                     | 20                              | 16        | 29                   |
|                   | <b>14-3-3-1</b>     | 17                    | 16                              | 14        | 88                   |
|                   | <b>14-4-4-1</b>     | 25                    | 16                              | 15        | 76                   |
|                   | <b>19-1-9-1</b>     | 35                    | 16                              | 14        | 92                   |
|                   | <b>19-1-9-2</b>     | 9                     | 14                              | 12        | 67                   |
|                   | <b>19-1-9-3</b>     | 26                    | 16                              | 15        | 77                   |
|                   | <b>19-1-9-4</b>     | 28                    | 16                              | 16        | 82                   |
|                   | <b>19-1-9-5</b>     | 20                    | 16                              | 16        | 80                   |

|                  |    |    |    |           |
|------------------|----|----|----|-----------|
| <b>19-1-9-6</b>  | 20 | 16 | 12 | 90        |
| <b>19-1-9-7</b>  | 17 | 18 | 15 | 76        |
| <b>19-1-9-9</b>  | 15 | 17 | 16 | 73        |
| <b>19-1-10-1</b> | 40 | 20 | 16 | 70        |
| <b>19-1-10-2</b> | 16 | 20 | 16 | 69        |
| <b>Average</b>   |    |    |    | <b>69</b> |

\* Modal chromosome numbers were determined as the most common chromosome number for *At* and *Aa* individually for each plant.

\*\* 4p and 5p denotes cells from different floral clusters of the same plant that either produced 5-petaled or 4-petaled flowers.
